# Supplementary material for: Global Profiling of Lysine Acetylation in Borrelia burgdorferi B31 Reveals Its Role in Central Metabolism
Source: PubMed Central journal article supplement (PMC6127242; doi:10.3389/fmicb.2018.02036), 2018-08-31
Supplement: Image_5.pdf [file Image_5.pdf]

# Glucose-6-phosphate isomerase - Pgi

NLNELENF<sub>K<sub>ac</sub></sub>ILEGIAPEVLK

Extracted from: D:\DATA\_Orbitrap\_2016\GALLO\_BONTEMPS\GALLO\_20160219\Burdo\_Kac\_stat\_4\_01.raw #12946 RT: 60.27  
 ITMS, CID@35.00, z=+3, Mono m/z=775.76080 Da, MH+=2325.26786 Da, Match Tol.=0.35 Da

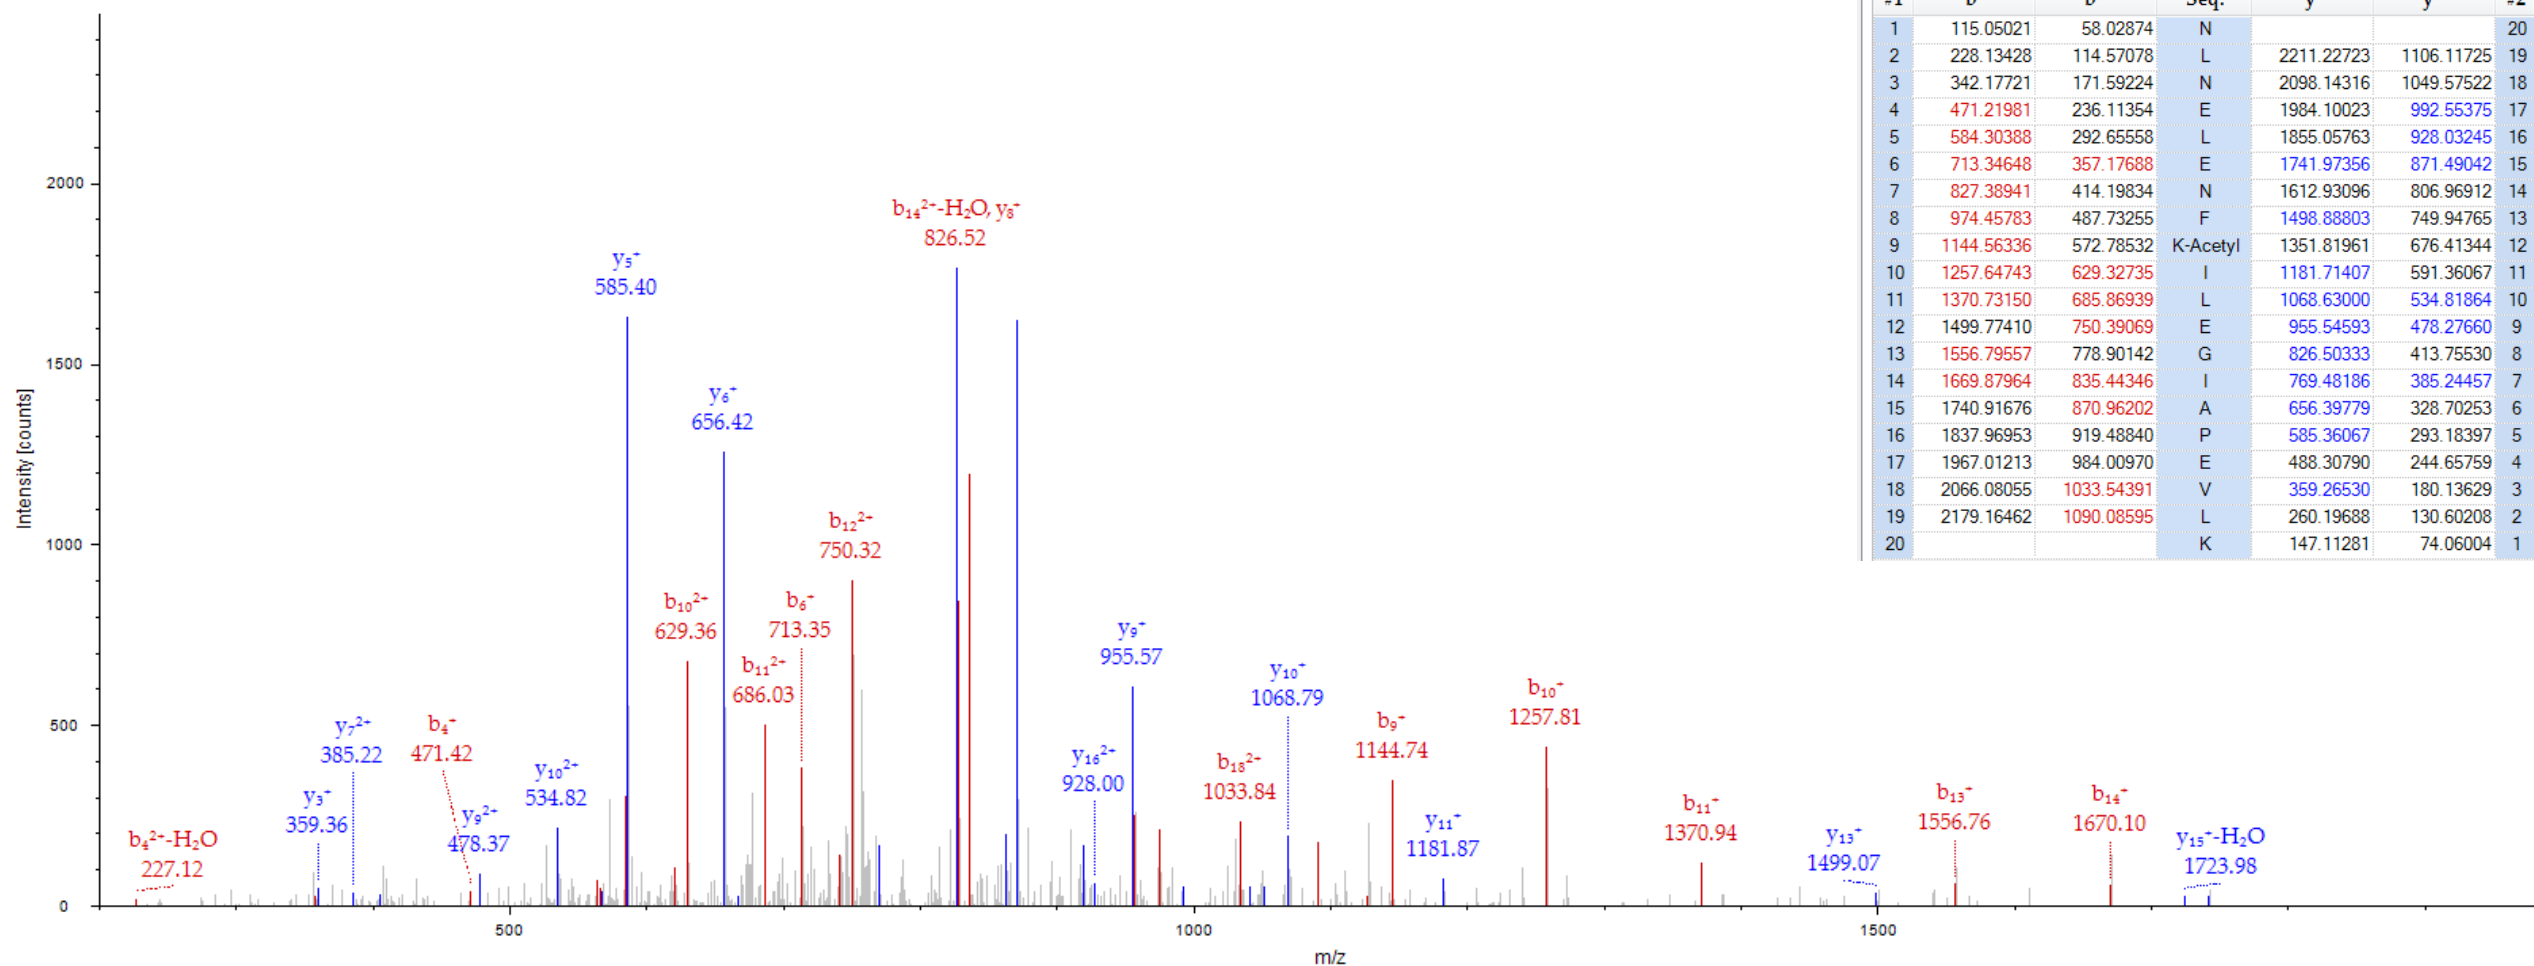

| Ion Series | Neutral Losses | Precursor Ions  |          |                |                 |    |
|------------|----------------|-----------------|----------|----------------|-----------------|----|
| #1         | b <sup>+</sup> | b <sup>2+</sup> | Seq.     | y <sup>+</sup> | y <sup>2+</sup> | #2 |
| 1          | 115.05021      | 58.02874        | N        |                |                 | 20 |
| 2          | 228.13428      | 114.57078       | L        | 2211.22723     | 1106.11725      | 19 |
| 3          | 342.17721      | 171.59224       | N        | 2098.14316     | 1049.57522      | 18 |
| 4          | 471.21981      | 236.11354       | E        | 1984.10023     | 992.55375       | 17 |
| 5          | 584.30388      | 292.65558       | L        | 1855.05763     | 928.03245       | 16 |
| 6          | 713.34648      | 357.17688       | E        | 1741.97356     | 871.49042       | 15 |
| 7          | 827.38941      | 414.19834       | N        | 1612.93096     | 806.96912       | 14 |
| 8          | 974.45783      | 487.73255       | F        | 1498.88803     | 749.94765       | 13 |
| 9          | 1144.56336     | 572.78532       | K-Acetyl | 1351.81961     | 676.41344       | 12 |
| 10         | 1257.64743     | 629.32735       | I        | 1181.71407     | 591.36067       | 11 |
| 11         | 1370.73150     | 685.86939       | L        | 1068.63000     | 534.81864       | 10 |
| 12         | 1499.77410     | 750.39069       | E        | 955.54593      | 478.27660       | 9  |
| 13         | 1556.79557     | 778.90142       | G        | 826.50333      | 413.75530       | 8  |
| 14         | 1669.87964     | 835.44346       | I        | 769.48186      | 385.24457       | 7  |
| 15         | 1740.91676     | 870.96202       | A        | 656.39779      | 328.70253       | 6  |
| 16         | 1837.96953     | 919.48840       | P        | 585.36067      | 293.18397       | 5  |
| 17         | 1967.01213     | 984.00970       | E        | 488.30790      | 244.65759       | 4  |
| 18         | 2066.08055     | 1033.54391      | V        | 359.26530      | 180.13629       | 3  |
| 19         | 2179.16462     | 1090.08595      | L        | 260.19688      | 130.60208       | 2  |
| 20         |                |                 | K        | 147.11281      | 74.06004        | 1  |

# Glucose-6-phosphate isomerase - Pgi

NDNF<sub>ac</sub>DEVIESYSK

Extracted from: D:\DATA\_Orbitrap\_2016\GALLO\_BONTEMPS\GALLO\_20160219\Burdo\_Kac\_stat\_4\_01.raw #8154 RT: 43.95  
 ITMS, CID@35.00, z=+2, Mono m/z=865.39966 Da, MH+=1729.79204 Da, Match Tol.=0.35 Da

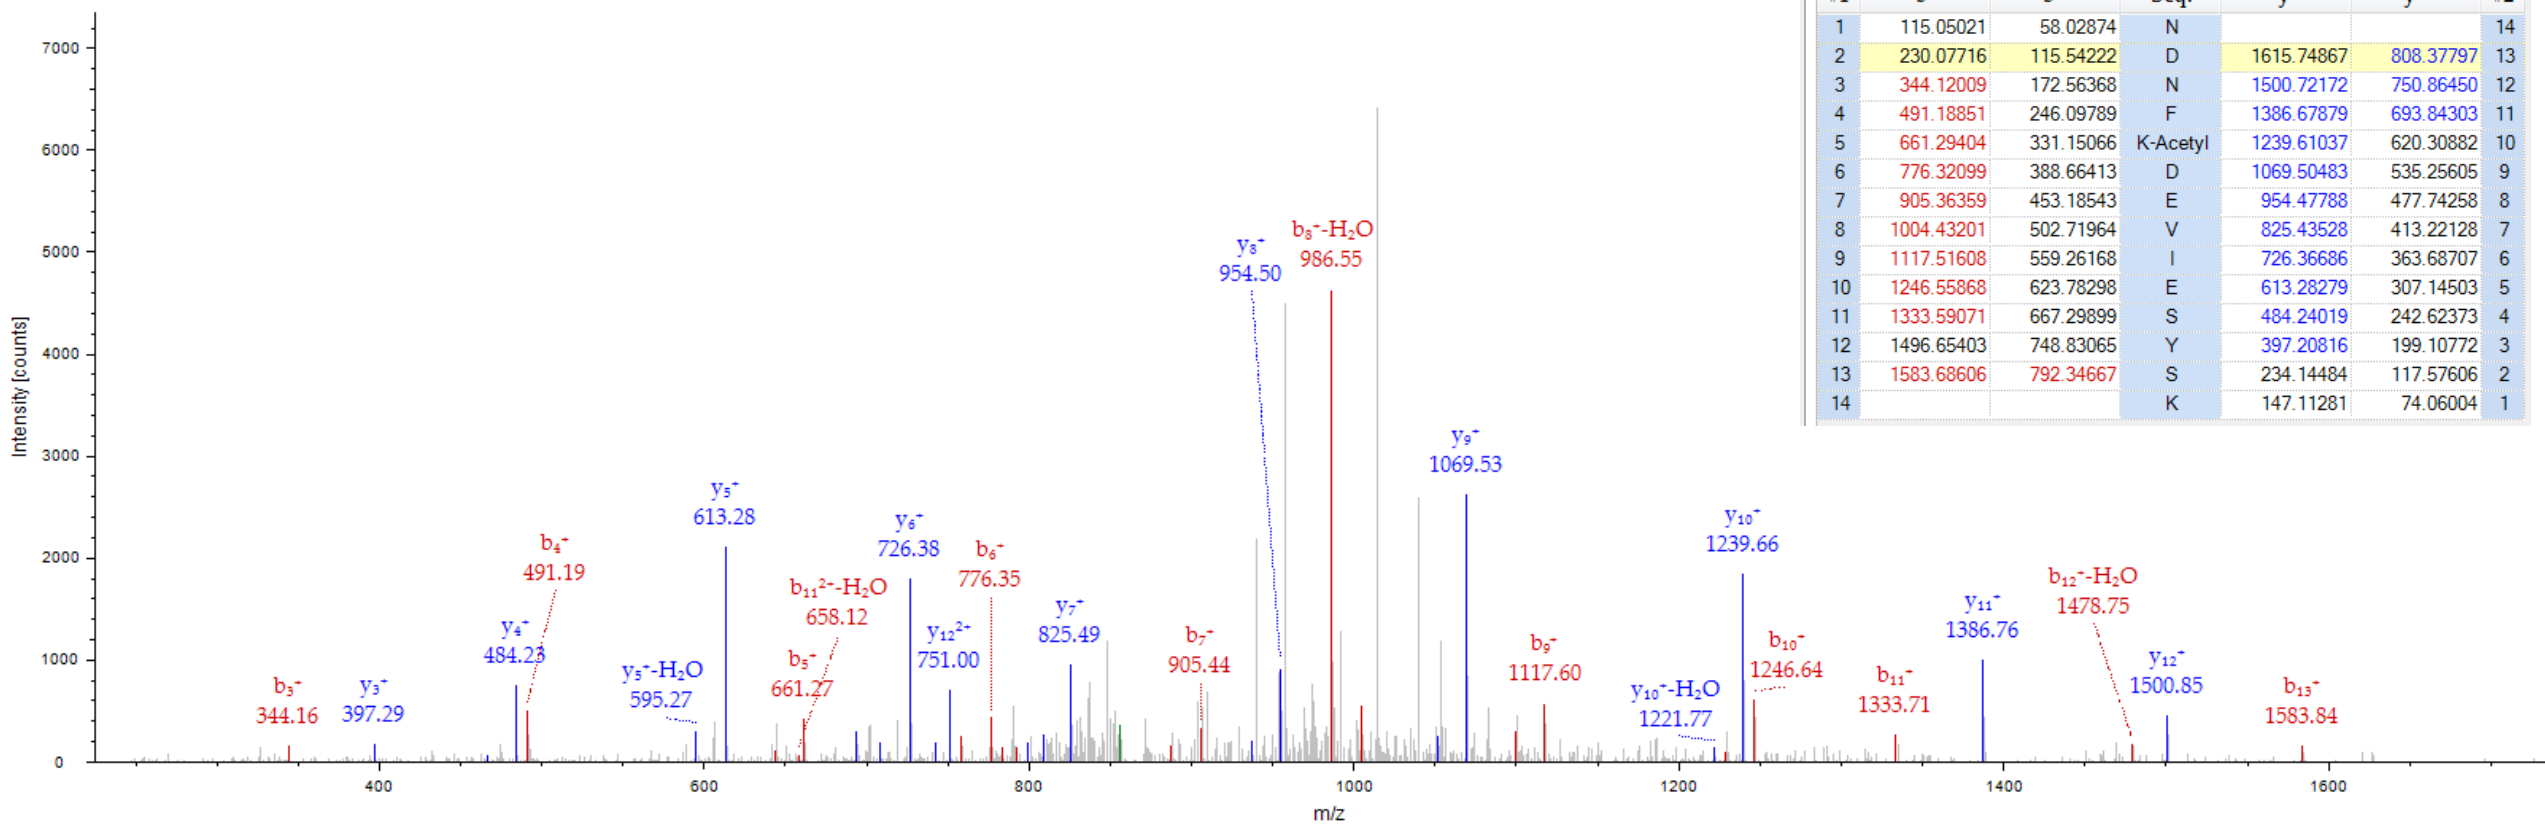

| Ion Series | Neutral Losses | Precursor Ions  |          |                |                 |    |
|------------|----------------|-----------------|----------|----------------|-----------------|----|
| #1         | b <sup>+</sup> | b <sup>2+</sup> | Seq.     | y <sup>+</sup> | y <sup>2+</sup> | #2 |
| 1          | 115.05021      | 58.02874        | N        |                |                 | 14 |
| 2          | 230.07716      | 115.54222       | D        | 1615.74867     | 808.37797       | 13 |
| 3          | 344.12009      | 172.56368       | N        | 1500.72172     | 750.86450       | 12 |
| 4          | 491.18851      | 246.09789       | F        | 1386.67879     | 693.84303       | 11 |
| 5          | 661.29404      | 331.15066       | K-Acetyl | 1239.61037     | 620.30882       | 10 |
| 6          | 776.32099      | 388.66413       | D        | 1069.50483     | 535.25605       | 9  |
| 7          | 905.36359      | 453.18543       | E        | 954.47788      | 477.74258       | 8  |
| 8          | 1004.43201     | 502.71964       | V        | 825.43528      | 413.22128       | 7  |
| 9          | 1117.51608     | 559.26168       | I        | 726.36686      | 363.68707       | 6  |
| 10         | 1246.55868     | 623.78298       | E        | 613.28279      | 307.14503       | 5  |
| 11         | 1333.59071     | 667.29899       | S        | 484.24019      | 242.62373       | 4  |
| 12         | 1496.65403     | 748.83065       | Y        | 397.20816      | 199.10772       | 3  |
| 13         | 1583.68606     | 792.34667       | S        | 234.14484      | 117.57606       | 2  |
| 14         |                |                 | K        | 147.11281      | 74.06004        | 1  |

# Glyceraldehyde-3-phosphate dehydrogenase - GAPDH

EI<sub>k</sub><sub>ac</sub> IIAER

Extracted from: D:\DATA\_Orbitrap\_2016\GALLO\_BONTEMPS\GALLO\_20160219\Burdo\_Kac\_stat\_4\_01.raw #5191 RT: 33.77  
ITMS, CID@35.00, z=+2, Mono m/z=507.30249 Da, MH+=1013.59770 Da, Match Tol.=0.35 Da

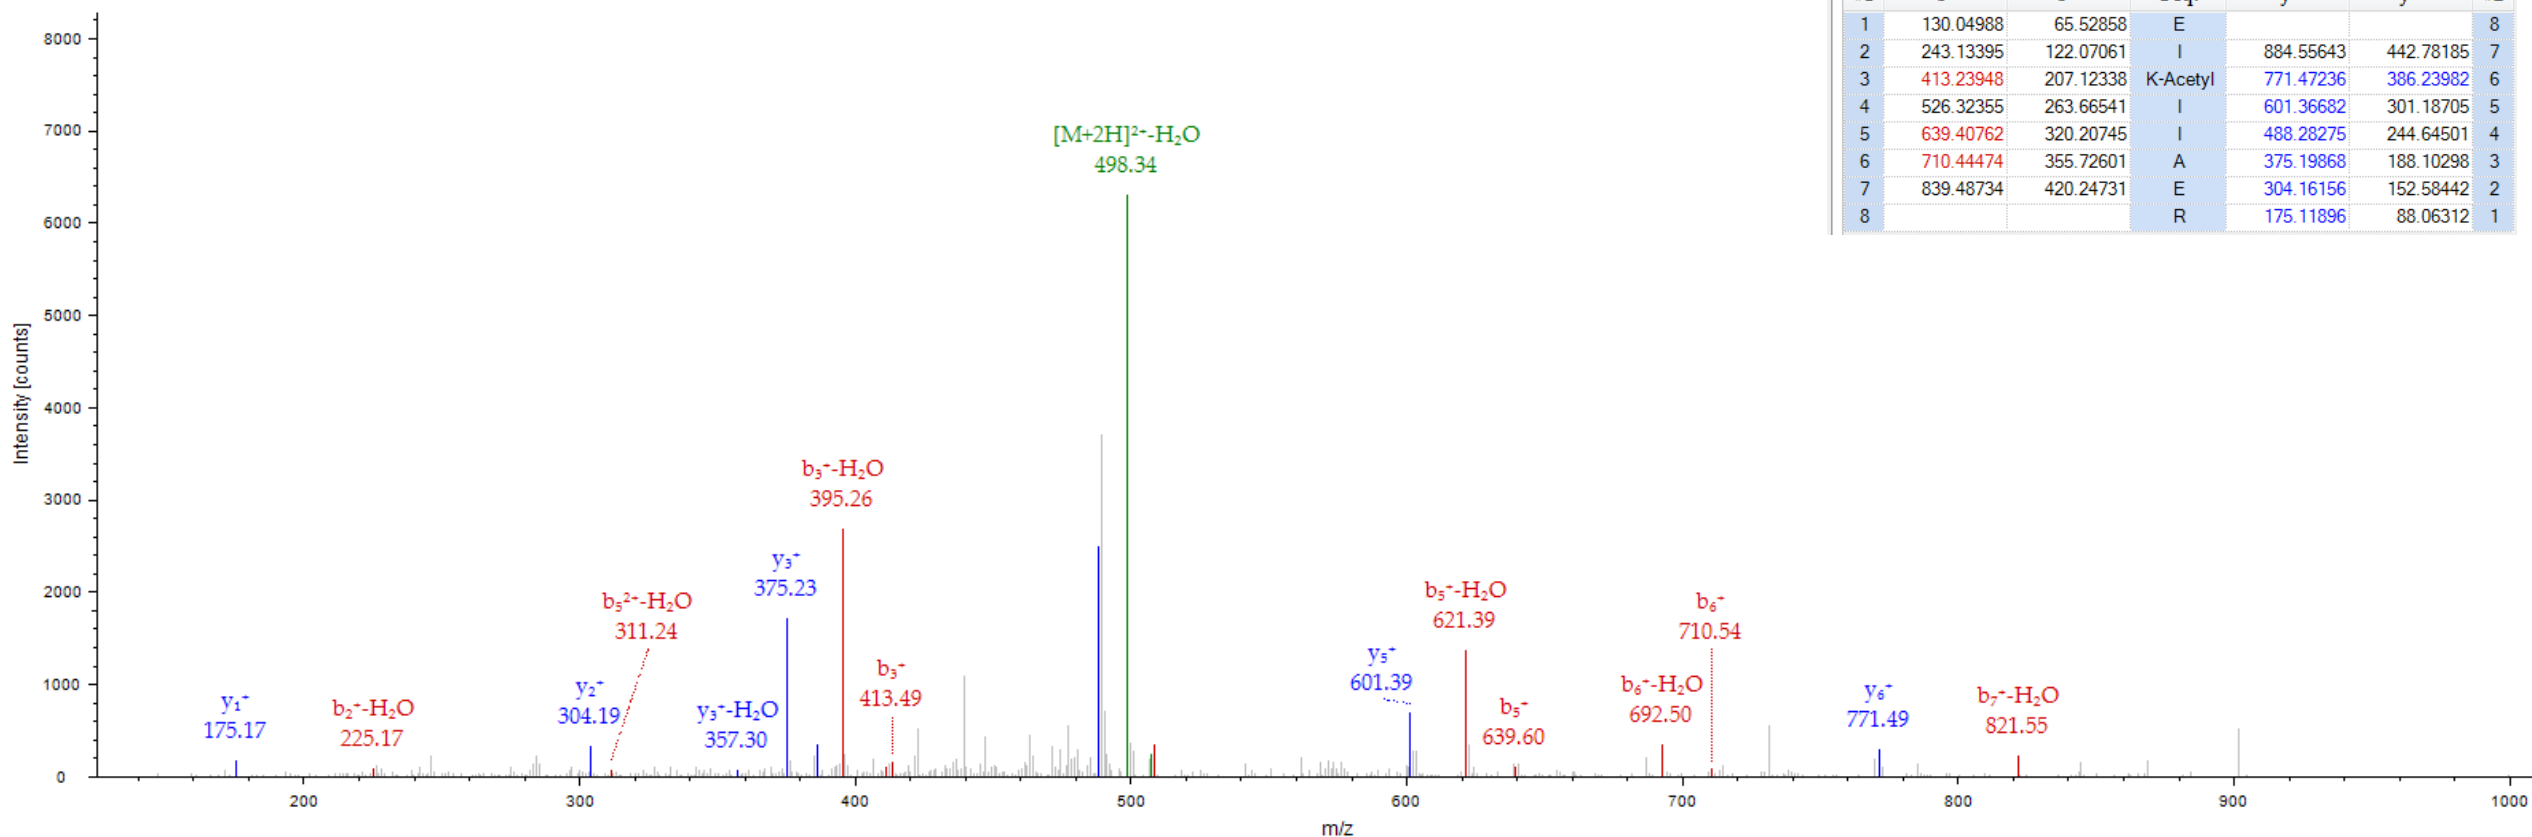

| Ion Series | Neutral Losses |                 | Precursor Ions |                |                 |    |
|------------|----------------|-----------------|----------------|----------------|-----------------|----|
| #1         | b <sup>+</sup> | b <sup>2+</sup> | Seq.           | y <sup>+</sup> | y <sup>2+</sup> | #2 |
| 1          | 130.04988      | 65.52858        | E              |                |                 | 8  |
| 2          | 243.13395      | 122.07061       | I              | 884.55643      | 442.78185       | 7  |
| 3          | 413.23948      | 207.12338       | K-Acetyl       | 771.47236      | 386.23982       | 6  |
| 4          | 526.32355      | 263.66541       | I              | 601.36682      | 301.18705       | 5  |
| 5          | 639.40762      | 320.20745       | I              | 488.28275      | 244.64501       | 4  |
| 6          | 710.44474      | 355.72601       | A              | 375.19868      | 188.10298       | 3  |
| 7          | 839.48734      | 420.24731       | E              | 304.16156      | 152.58442       | 2  |
| 8          |                |                 | R              | 175.11896      | 88.06312        | 1  |

# Glyceraldehyde-3-phosphate dehydrogenase - GAPDH

AVGLVLPEL<sub>ac</sub>K GK

Extracted from: D:\DATA\_Orbitrap\_2016\GALLO\_BONTEMPS\GALLO\_20160219\Burdo\_Kac\_stat\_4\_01.raw #8621 RT: 45.47 ITMS, CID@35.00, z=+2, Mono m/z=633.39545 Da, MH+=1265.78362 Da, Match Tol.=0.35 Da

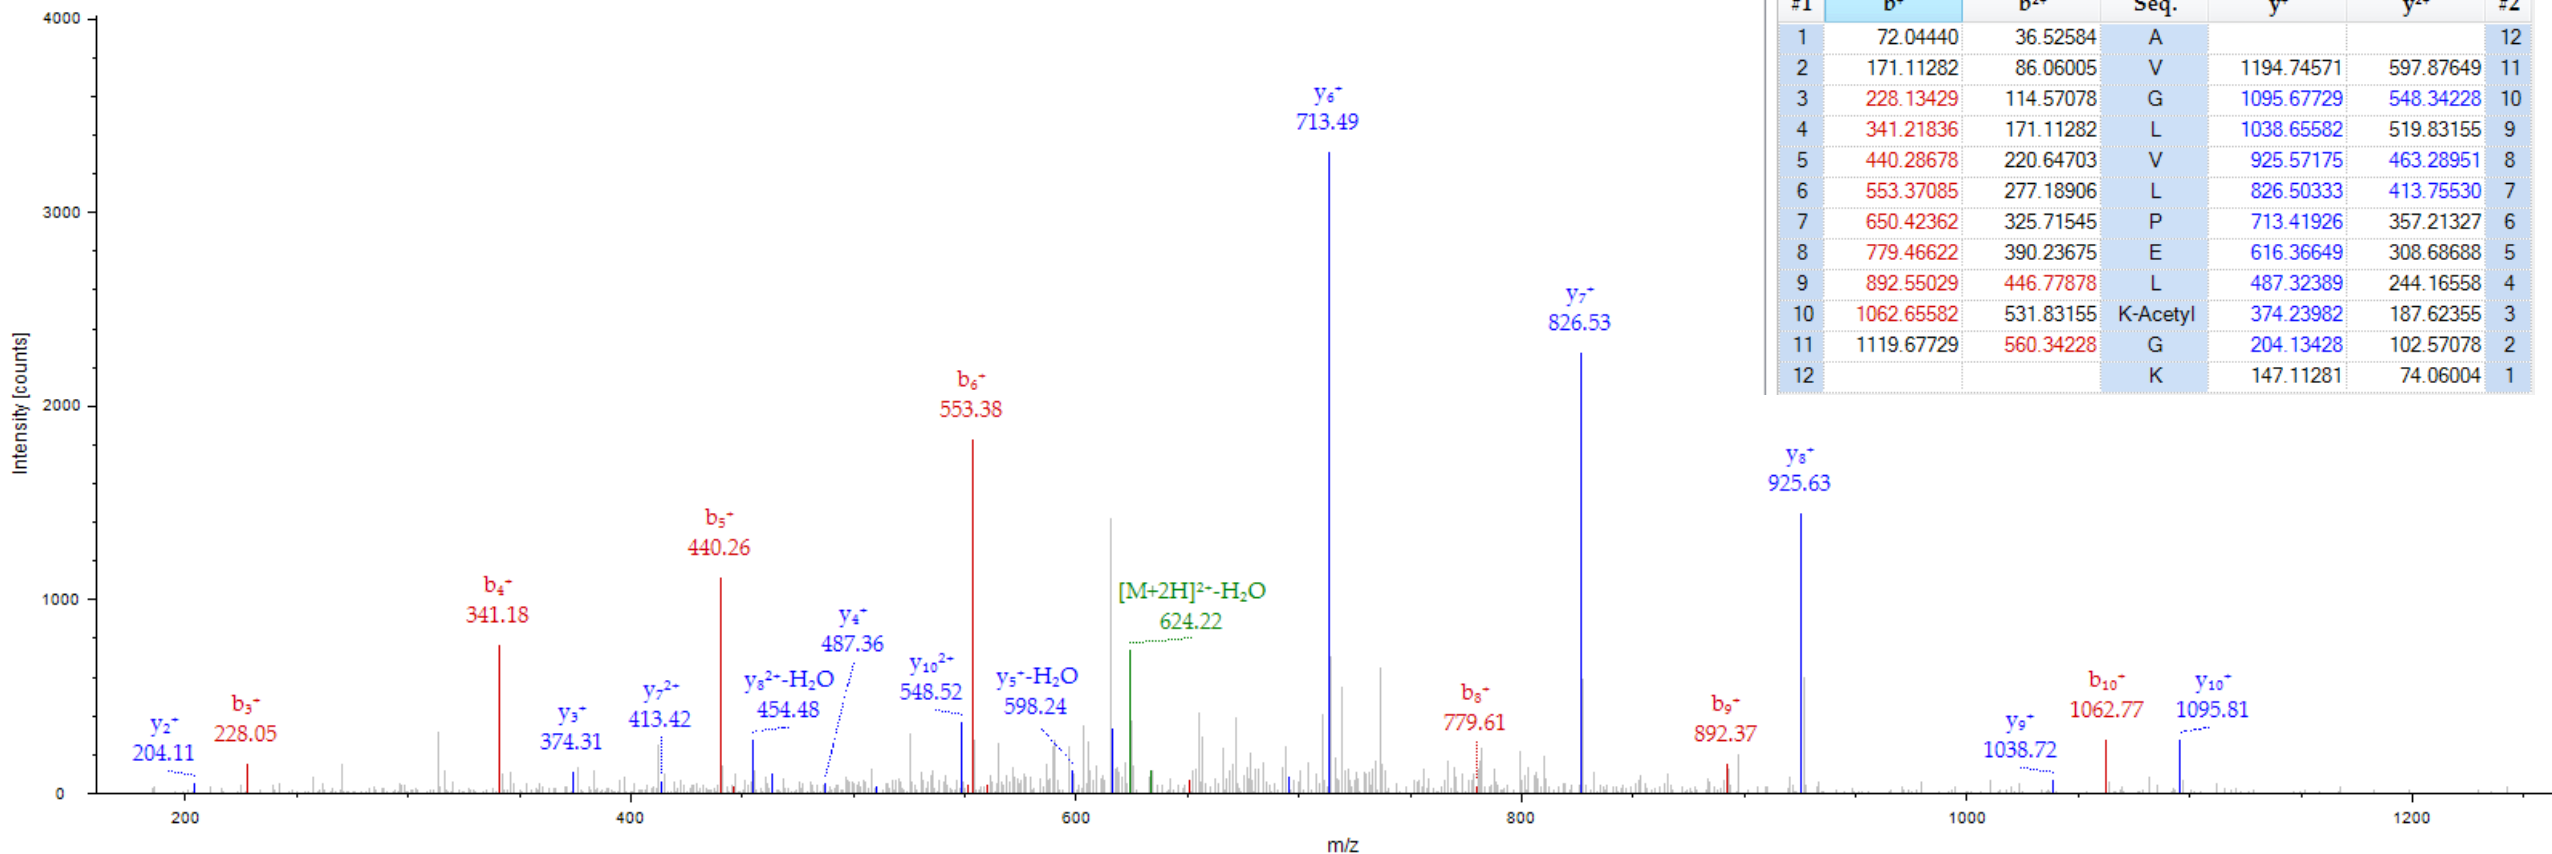

| Ion Series | Neutral Losses | Precursor Ions  |          |                |                 |    |
|------------|----------------|-----------------|----------|----------------|-----------------|----|
| #1         | b <sup>+</sup> | b <sup>2+</sup> | Seq.     | y <sup>+</sup> | y <sup>2+</sup> | #2 |
| 1          | 72.04440       | 36.52584        | A        |                |                 | 12 |
| 2          | 171.11282      | 86.06005        | V        | 1194.74571     | 597.87649       | 11 |
| 3          | 228.13429      | 114.57078       | G        | 1095.67729     | 548.34228       | 10 |
| 4          | 341.21836      | 171.11282       | L        | 1038.65582     | 519.83155       | 9  |
| 5          | 440.28678      | 220.64703       | V        | 925.57175      | 463.28951       | 8  |
| 6          | 553.37085      | 277.18906       | L        | 826.50333      | 413.75530       | 7  |
| 7          | 650.42362      | 325.71545       | P        | 713.41926      | 357.21327       | 6  |
| 8          | 779.46622      | 390.23675       | E        | 616.36649      | 308.68688       | 5  |
| 9          | 892.55029      | 446.77878       | L        | 487.32389      | 244.16558       | 4  |
| 10         | 1062.65582     | 531.83155       | K-Acetyl | 374.23982      | 187.62355       | 3  |
| 11         | 1119.67729     | 560.34228       | G        | 204.13428      | 102.57078       | 2  |
| 12         |                |                 | K        | 147.11281      | 74.06004        | 1  |

# Glyceraldehyde-3-phosphate dehydrogenase - GAPDH

DVT<sub>ac</sub>EEINSVLR

Extracted from: D:\DATA\_Orbitrap\_2016\GALLO\_BONTEMPS\GALLO\_20160219\Burdo\_Kac\_stat\_4\_01.raw #7798 RT: 42.79  
 ITMS, CID@35.00, z=+2, Mono m/z=722.88464 Da, MH+=1444.76201 Da, Match Tol.=0.35 Da

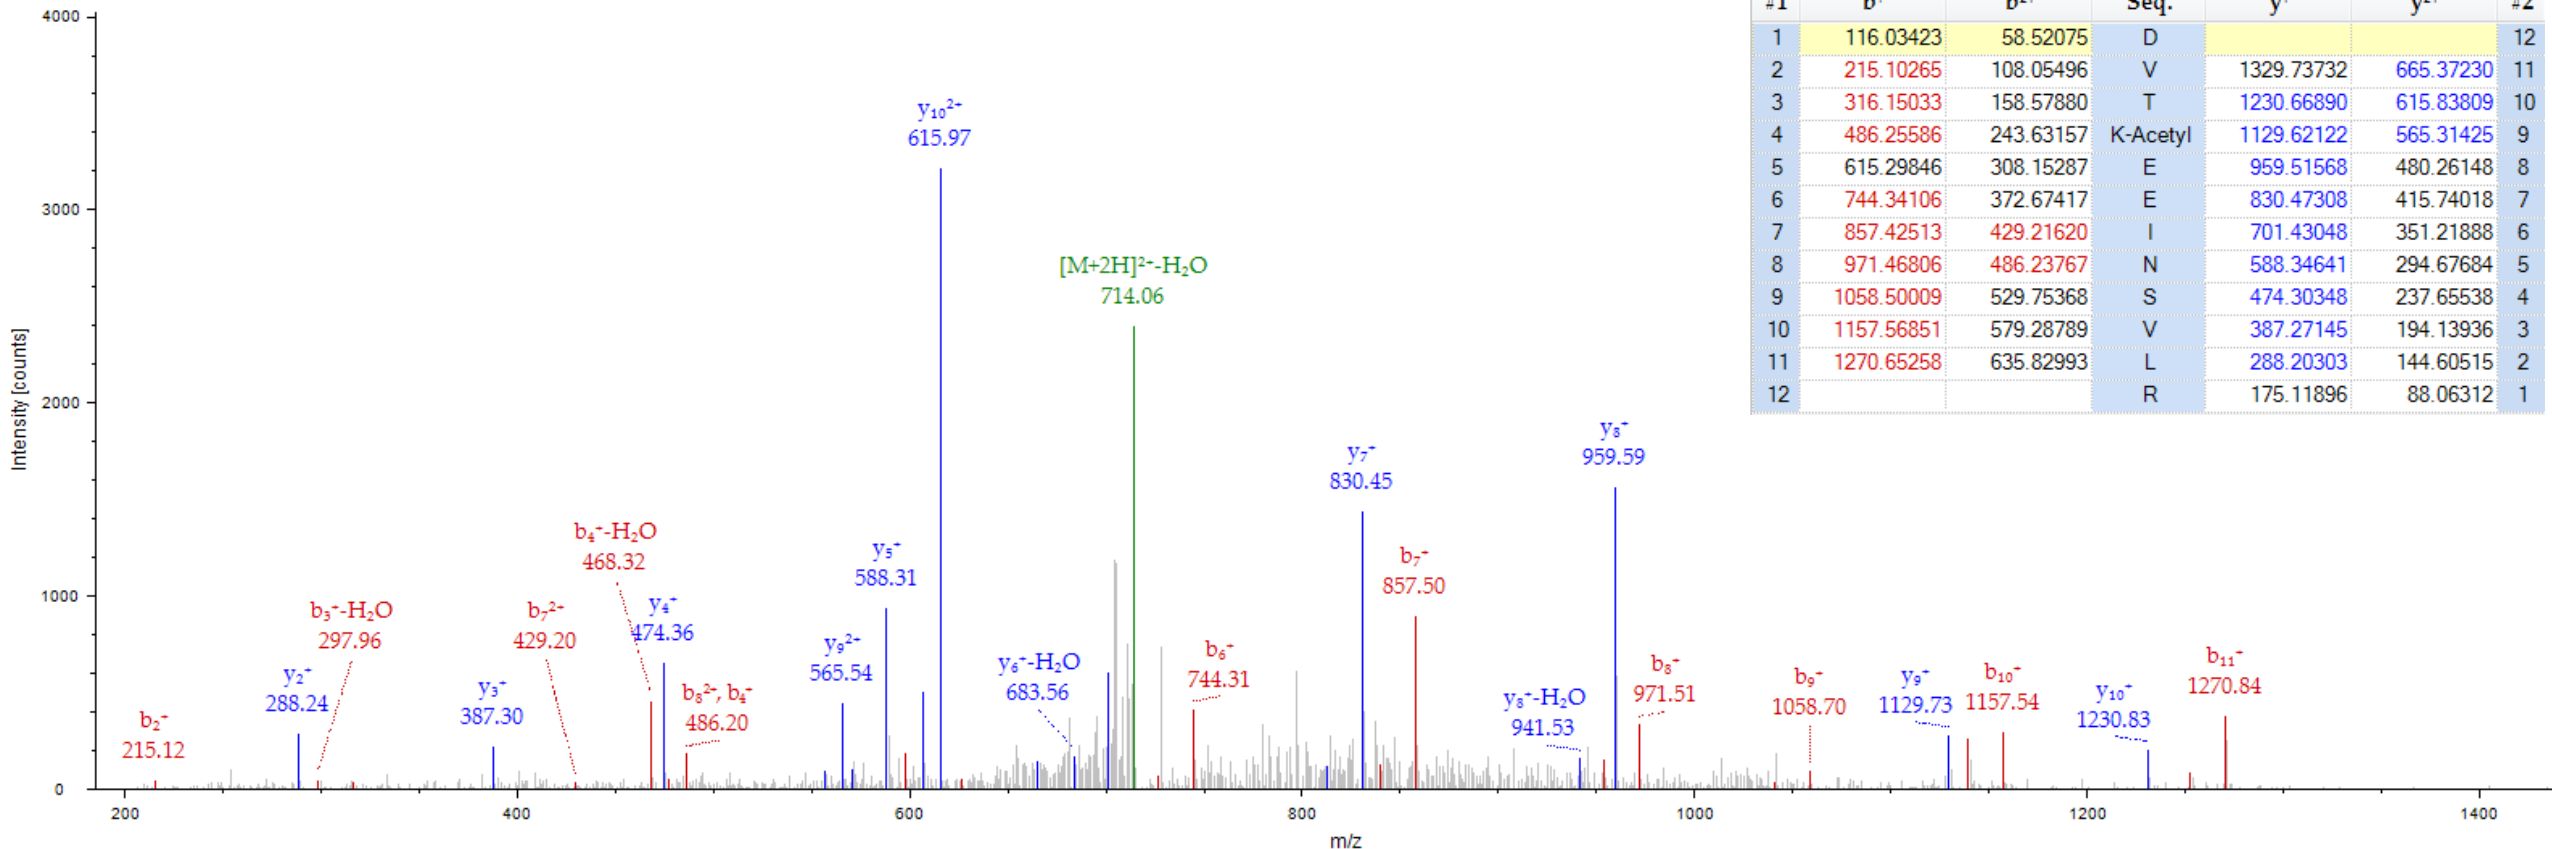

| Ion Series | Neutral Losses | Precursor Ions  |          |                |                 |    |
|------------|----------------|-----------------|----------|----------------|-----------------|----|
| #1         | b <sup>+</sup> | b <sup>2+</sup> | Seq.     | y <sup>+</sup> | y <sup>2+</sup> | #2 |
| 1          | 116.03423      | 58.52075        | D        |                |                 | 12 |
| 2          | 215.10265      | 108.05496       | V        | 1329.73732     | 665.37230       | 11 |
| 3          | 316.15033      | 158.57880       | T        | 1230.66890     | 615.83809       | 10 |
| 4          | 486.25586      | 243.63157       | K-Acetyl | 1129.62122     | 565.31425       | 9  |
| 5          | 615.29846      | 308.15287       | E        | 959.51568      | 480.26148       | 8  |
| 6          | 744.34106      | 372.67417       | E        | 830.47308      | 415.74018       | 7  |
| 7          | 857.42513      | 429.21620       | I        | 701.43048      | 351.21888       | 6  |
| 8          | 971.46806      | 486.23767       | N        | 588.34641      | 294.67684       | 5  |
| 9          | 1058.50009     | 529.75368       | S        | 474.30348      | 237.65538       | 4  |
| 10         | 1157.56851     | 579.28789       | V        | 387.27145      | 194.13936       | 3  |
| 11         | 1270.65258     | 635.82993       | L        | 288.20303      | 144.60515       | 2  |
| 12         |                |                 | R        | 175.11896      | 88.06312        | 1  |

# Glyceraldehyde-3-phosphate dehydrogenase - GAPDH

VVDLAQ<sub>k<sub>ac</sub></sub>LVK

Extracted from: D:\DATA\_Orbitrap\_2016\GALLO\_BONTEMPS\GALLO\_20160208\Burdo\_Kac\_stat\_sansNP40\_01.raw #8243 RT: 42.76  
 ITMS, CID@35.00, z=+2, Mono m/z=577.86023 Da, MH+=1154.71318 Da, Match Tol.=0.35 Da

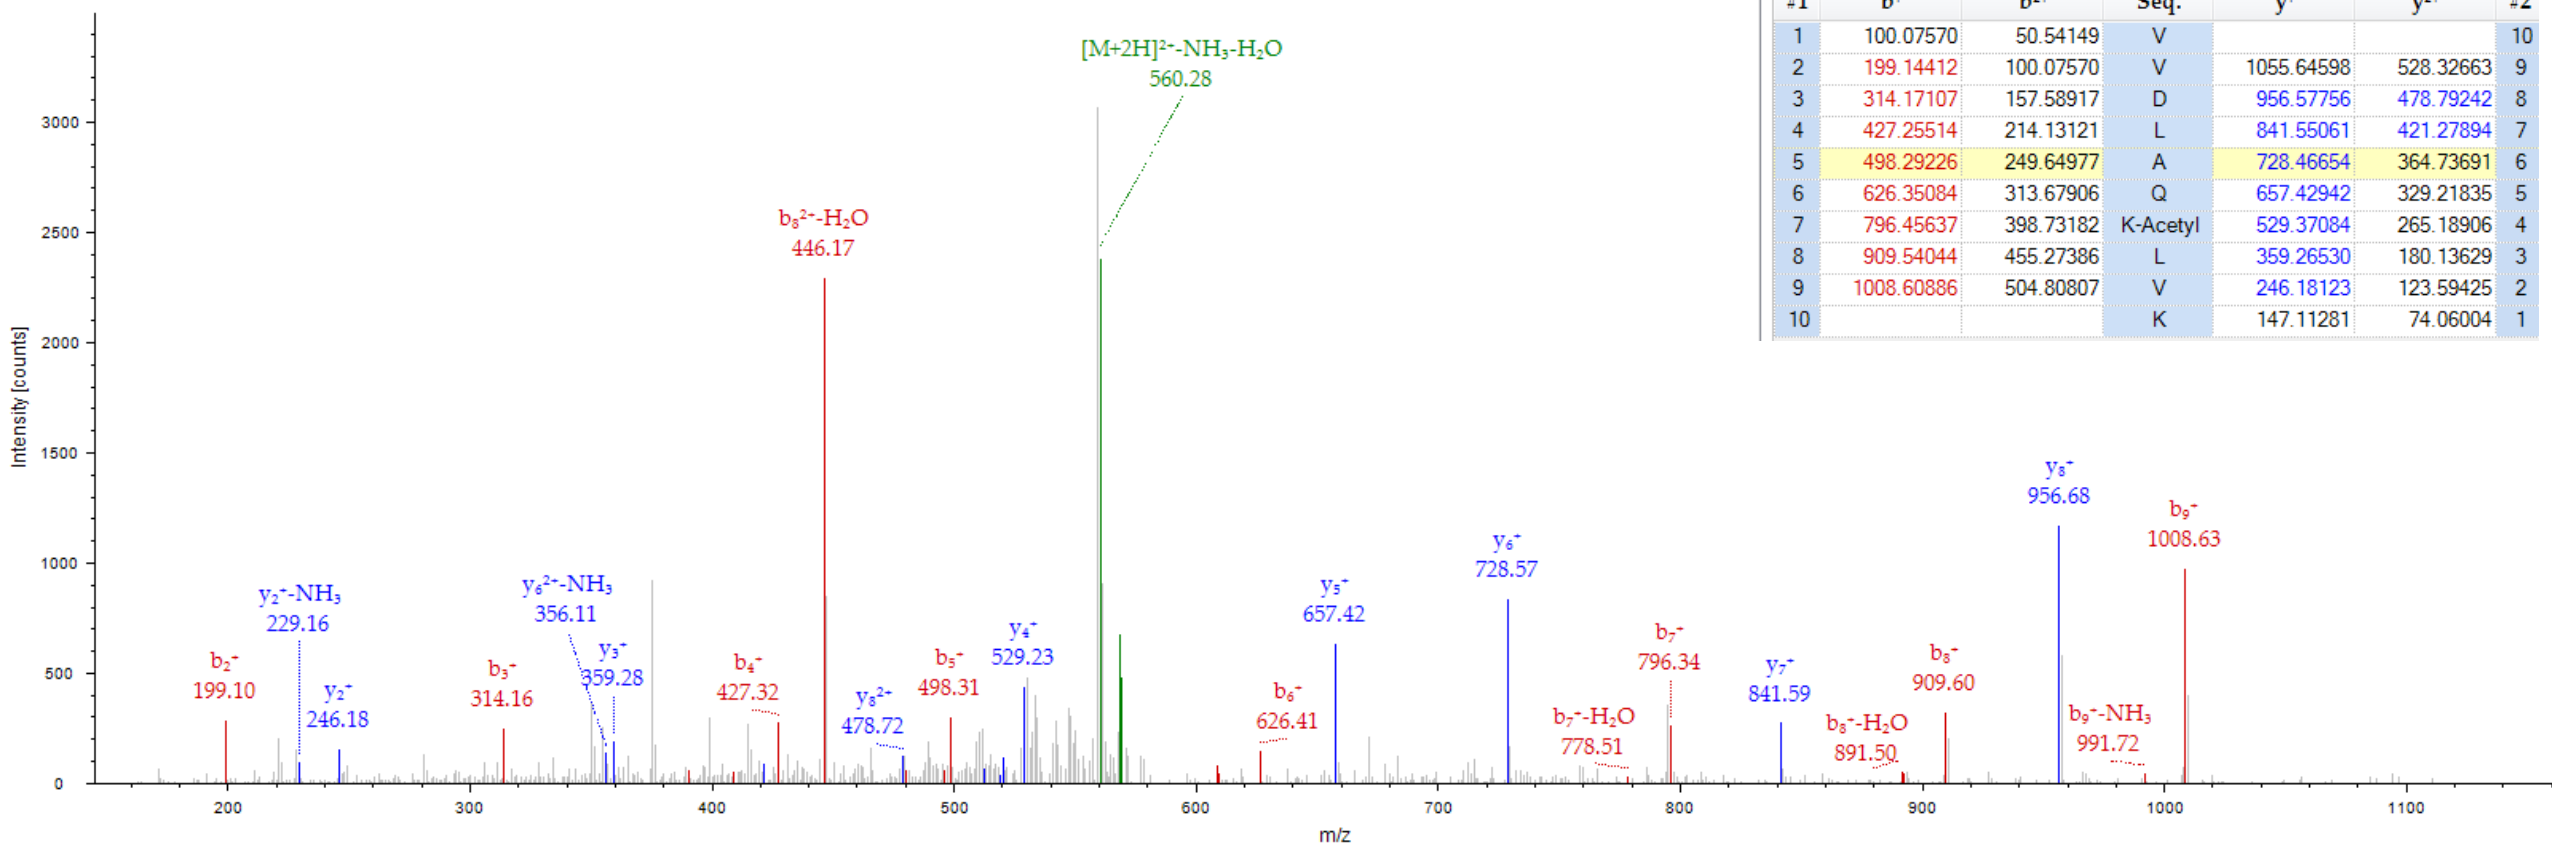

# 2,3-bisphosphoglycerate-dependent phosphoglycerate mutase - GpmA

HYVLGDES<sub>ac</sub>K<sub>ac</sub>IK

Extracted from: D:\DATA\_Orbitrap\_2016\GALLO\_BONTEMPS\GALLO\_20160219\Burdo\_Kac\_stat\_4\_01.raw #4396 RT: 30.62  
 ITMS, CID@35.00, z=+2, Mono m/z=697.85278 Da, MH+=1394.69829 Da, Match Tol.=0.35 Da

| Ion Series | Neutral Losses | Precursor Ions  |          |                |                 |    |
|------------|----------------|-----------------|----------|----------------|-----------------|----|
| #1         | b <sup>+</sup> | b <sup>2+</sup> | Seq.     | y <sup>+</sup> | y <sup>2+</sup> | #2 |
| 1          | 138.06619      | 69.53673        | H        |                |                 | 11 |
| 2          | 301.12951      | 151.06839       | Y        | 1257.63618     | 629.32173       | 10 |
| 3          | 464.19283      | 232.60005       | Y        | 1094.57286     | 547.79007       | 9  |
| 4          | 577.27690      | 289.14209       | L        | 931.50954      | 466.25841       | 8  |
| 5          | 634.29837      | 317.65282       | G        | 818.42547      | 409.71637       | 7  |
| 6          | 749.32532      | 375.16630       | D        | 761.40400      | 381.20564       | 6  |
| 7          | 878.36792      | 439.68760       | E        | 646.37705      | 323.69216       | 5  |
| 8          | 965.39995      | 483.20361       | S        | 517.33445      | 259.17086       | 4  |
| 9          | 1135.50548     | 568.25638       | K-Acetyl | 430.30242      | 215.65485       | 3  |
| 10         | 1248.58955     | 624.79841       | I        | 260.19688      | 130.60208       | 2  |
| 11         |                |                 | K        | 147.11281      | 74.06004        | 1  |

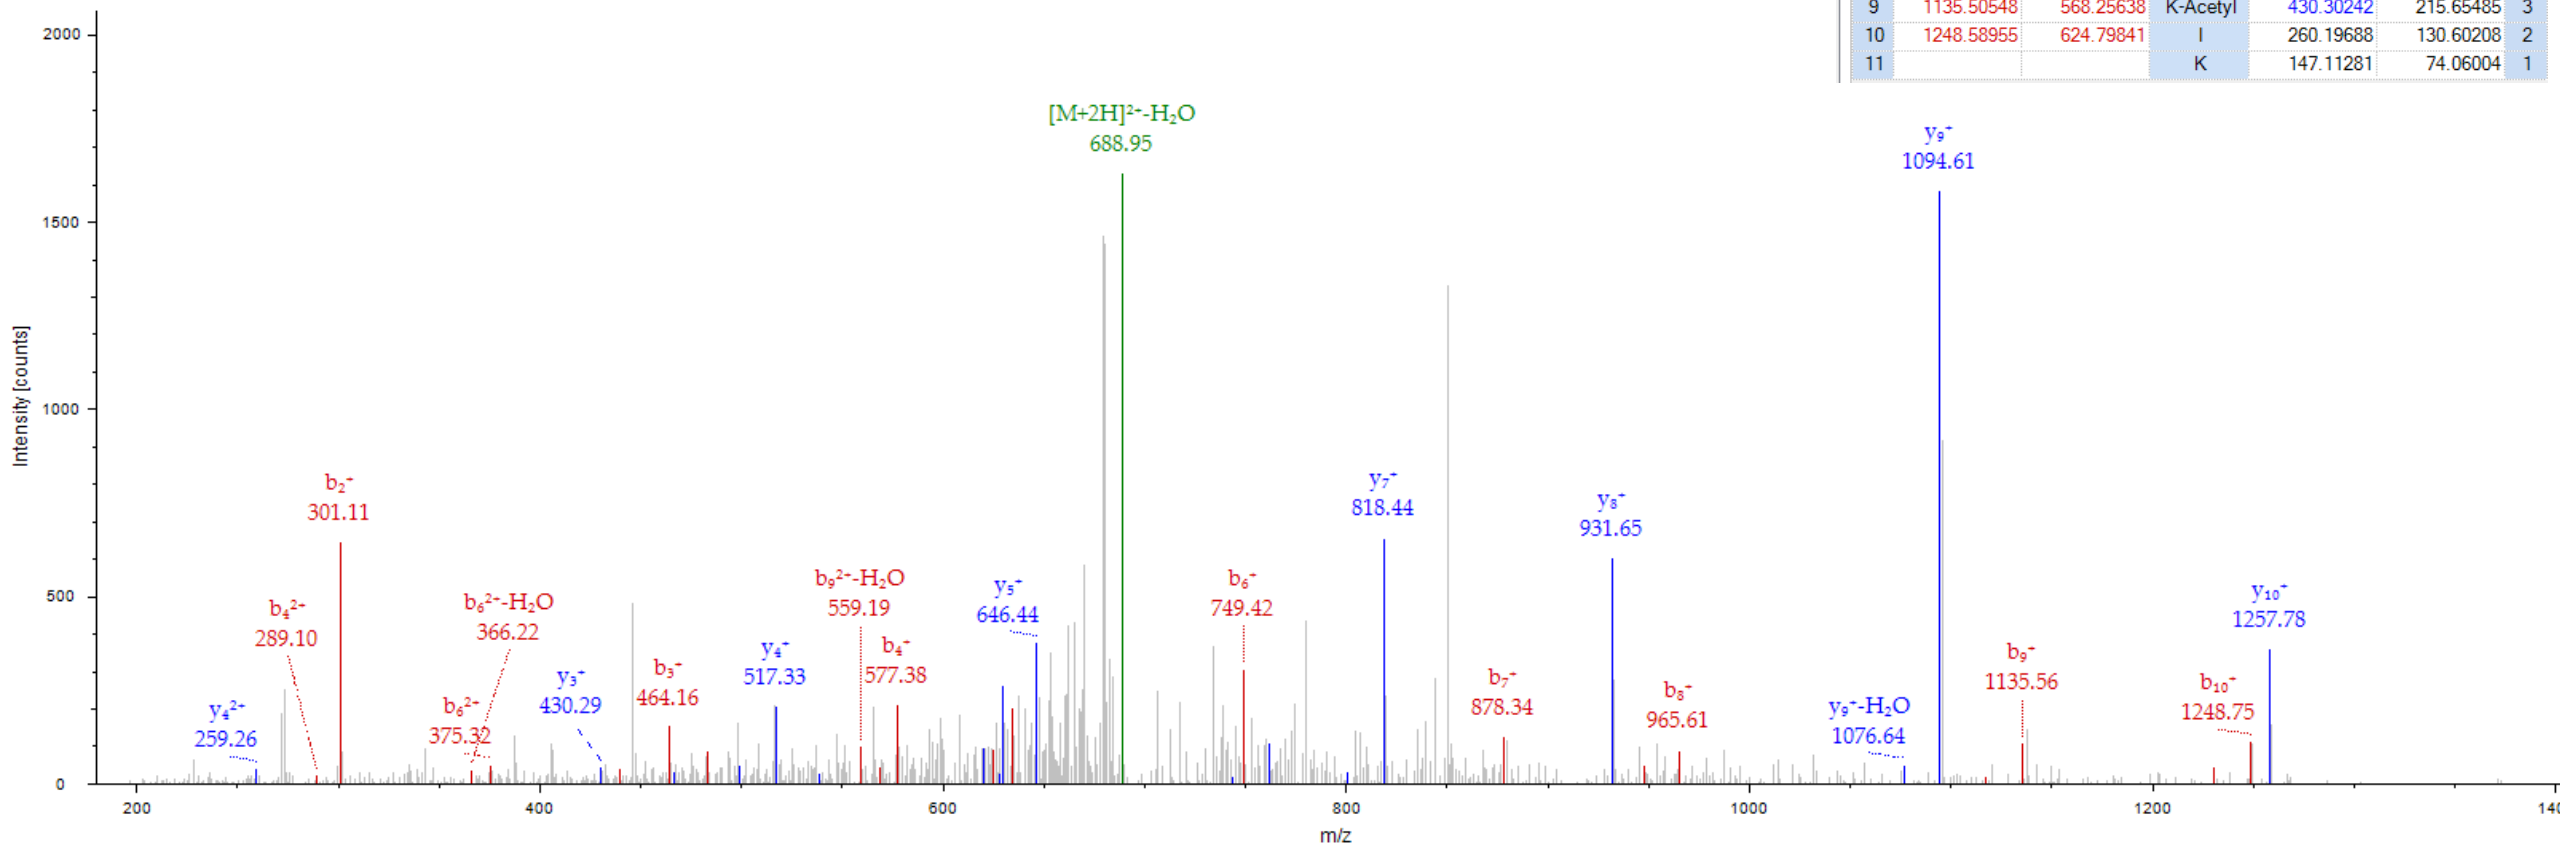

# 2,3-bisphosphoglycerate-dependent phosphoglycerate mutase - GpmA

AMESVASQG<sub>ac</sub>K<sub>LK</sub>

Extracted from: D:\DATA\_Orbitrap\_2016\GALLO\_BONTEMPS\GALLO\_20160219\Burdo\_Kac\_stat\_4\_01.raw #3826 RT: 28.24  
ITMS, CID@35.00, z=+2, Mono m/z=645.84027 Da, MH+=1290.67327 Da, Match Tol.=0.35 Da

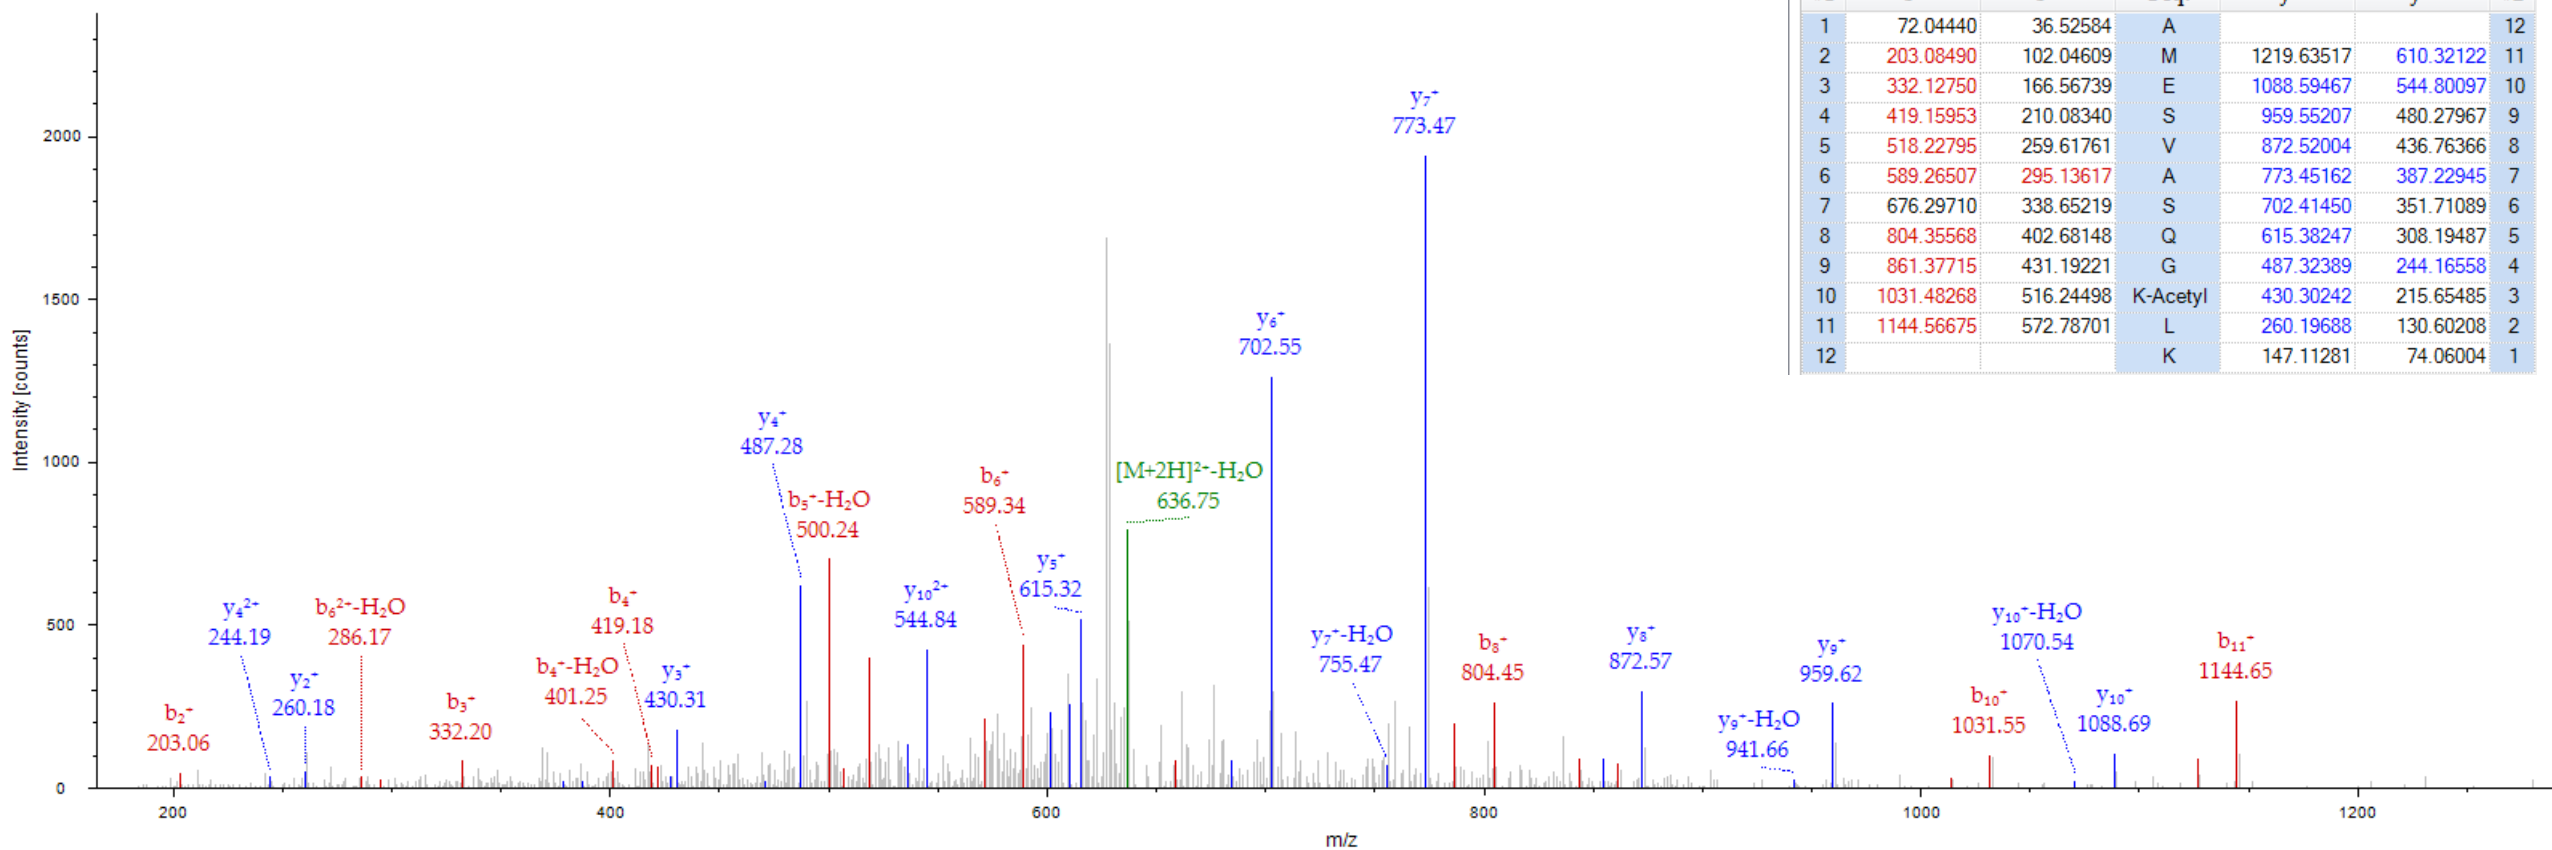

| Ion Series | Neutral Losses | Precursor Ions  |          |                |                 |    |
|------------|----------------|-----------------|----------|----------------|-----------------|----|
| #1         | b <sup>+</sup> | b <sup>2+</sup> | Seq.     | y <sup>+</sup> | y <sup>2+</sup> | #2 |
| 1          | 72.04440       | 36.52584        | A        |                |                 | 12 |
| 2          | 203.08490      | 102.04609       | M        | 1219.63517     | 610.32122       | 11 |
| 3          | 332.12750      | 166.56739       | E        | 1088.59467     | 544.80097       | 10 |
| 4          | 419.15953      | 210.08340       | S        | 959.55207      | 480.27967       | 9  |
| 5          | 518.22795      | 259.61761       | V        | 872.52004      | 436.76366       | 8  |
| 6          | 589.26507      | 295.13617       | A        | 773.45162      | 387.22945       | 7  |
| 7          | 676.29710      | 338.65219       | S        | 702.41450      | 351.71089       | 6  |
| 8          | 804.35568      | 402.68148       | Q        | 615.38247      | 308.19487       | 5  |
| 9          | 861.37715      | 431.19221       | G        | 487.32389      | 244.16558       | 4  |
| 10         | 1031.48268     | 516.24498       | K-Acetyl | 430.30242      | 215.65485       | 3  |
| 11         | 1144.56675     | 572.78701       | L        | 260.19688      | 130.60208       | 2  |
| 12         |                |                 | K        | 147.11281      | 74.06004        | 1  |



# Enolase - Eno

YVLK<sub>ac</sub>WSTK

Extracted from: D:\DATA\_Orbitrap\_2016\GALLO\_BONTEMPS\GALLO\_20160219\Burdo\_Kac\_stat\_4\_01.raw #6473 RT: 38.27  
ITMS, CID@35.00, z=+2, Mono m/z=533.80011 Da, MH+=1066.59294 Da, Match Tol.=0.35 Da

| Ion Series | Neutral Losses | Precursor Ions  |          |                |                 |    |
|------------|----------------|-----------------|----------|----------------|-----------------|----|
| #1         | b <sup>+</sup> | b <sup>2+</sup> | Seq.     | y <sup>+</sup> | y <sup>2+</sup> | #2 |
| 1          | 164.07060      | 82.53894        | Y        |                |                 | 8  |
| 2          | 263.13902      | 132.07315       | V        | 903.52987      | 452.26857       | 7  |
| 3          | 376.22309      | 188.61518       | L        | 804.46145      | 402.73436       | 6  |
| 4          | 546.32862      | 273.66795       | K-Acetyl | 691.37738      | 346.19233       | 5  |
| 5          | 732.40794      | 366.70761       | W        | 521.27184      | 261.13956       | 4  |
| 6          | 819.43997      | 410.22362       | S        | 335.19252      | 168.09990       | 3  |
| 7          | 920.48765      | 460.74746       | T        | 248.16049      | 124.58388       | 2  |
| 8          |                |                 | K        | 147.11281      | 74.06004        | 1  |

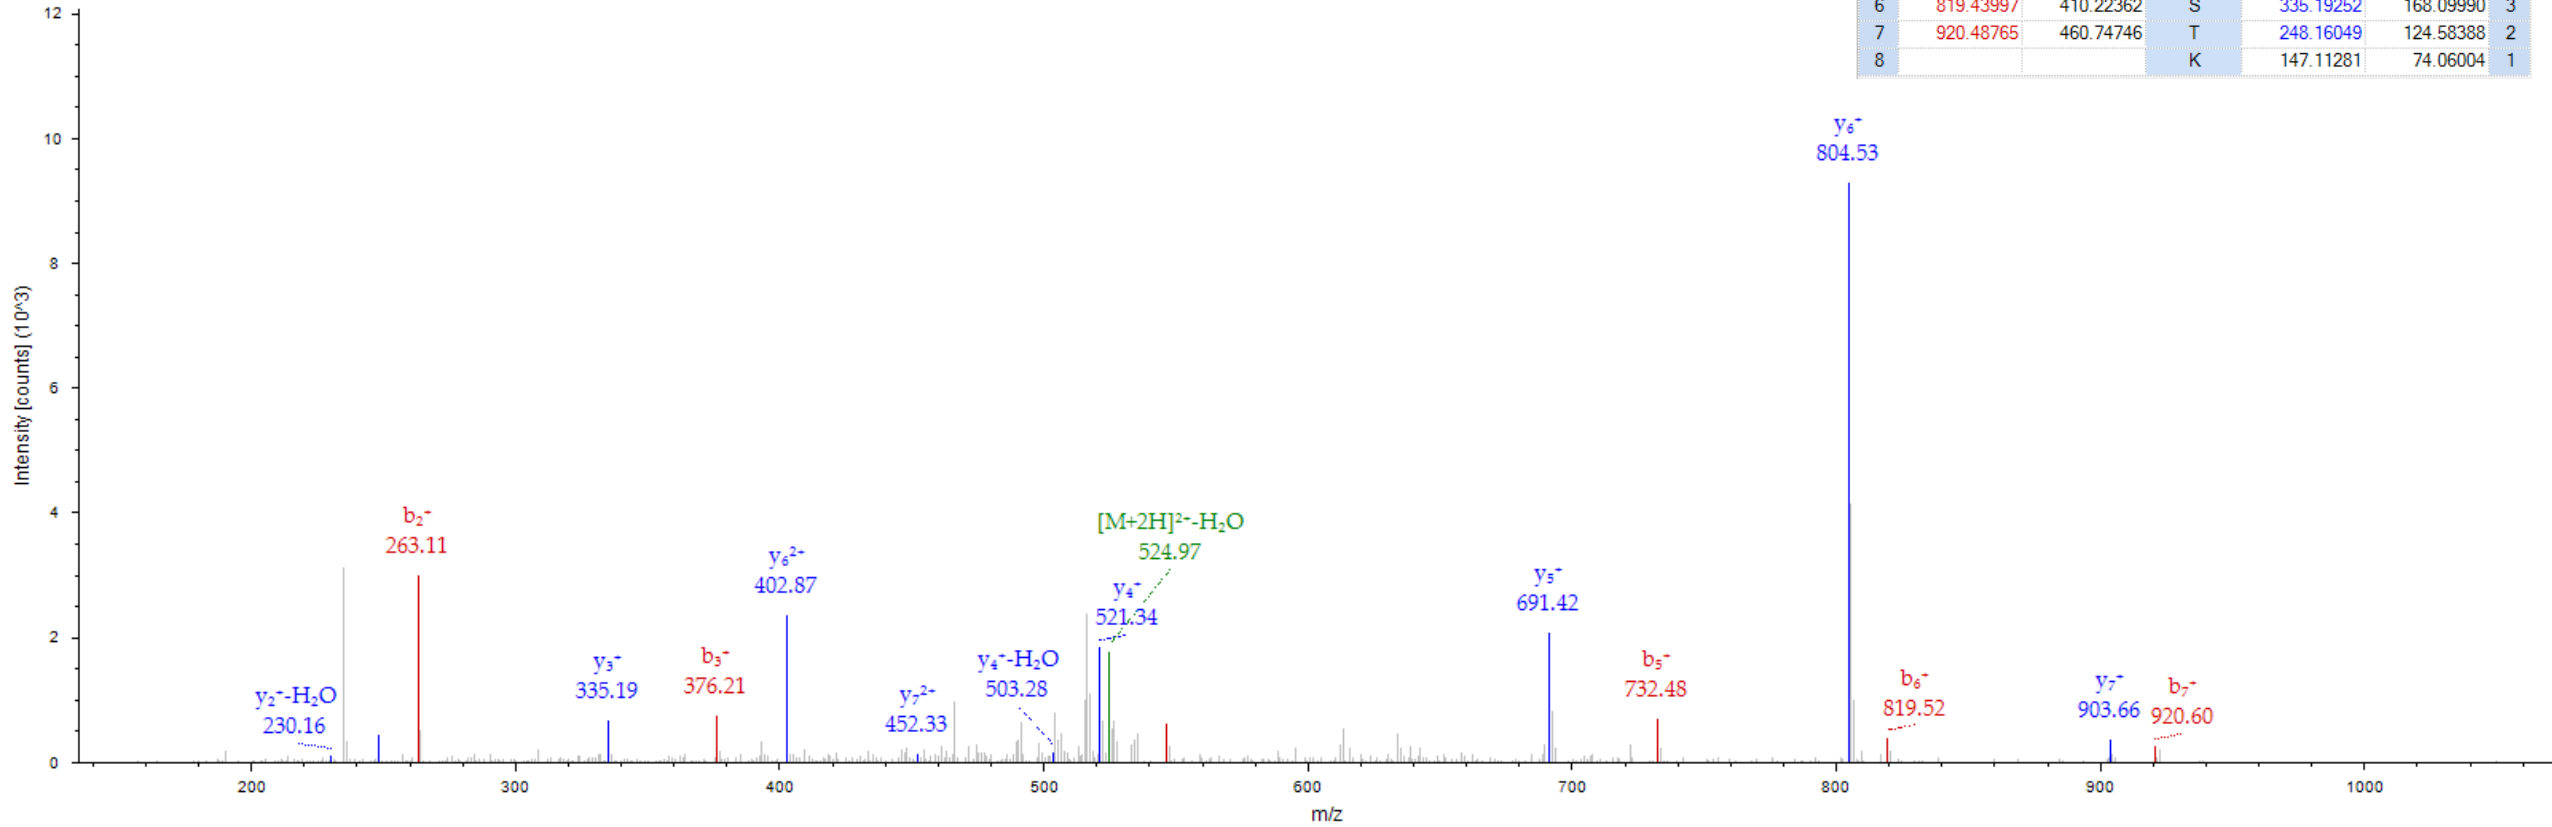

# Enolase - Eno

LTSEQMVEYWAK<sub>ac</sub>WVEK

Extracted from: D:\DATA\_Orbitrap\_2016\GALLO\_BONTEMPS\GALLO\_20160219\Burdo\_Kac\_stat\_4\_01.raw #13087 RT: 60.82  
ITMS, CID@35.00, z=+3, Mono m/z=690.34045 Da, MH+=2069.00681 Da, Match Tol.=0.35 Da

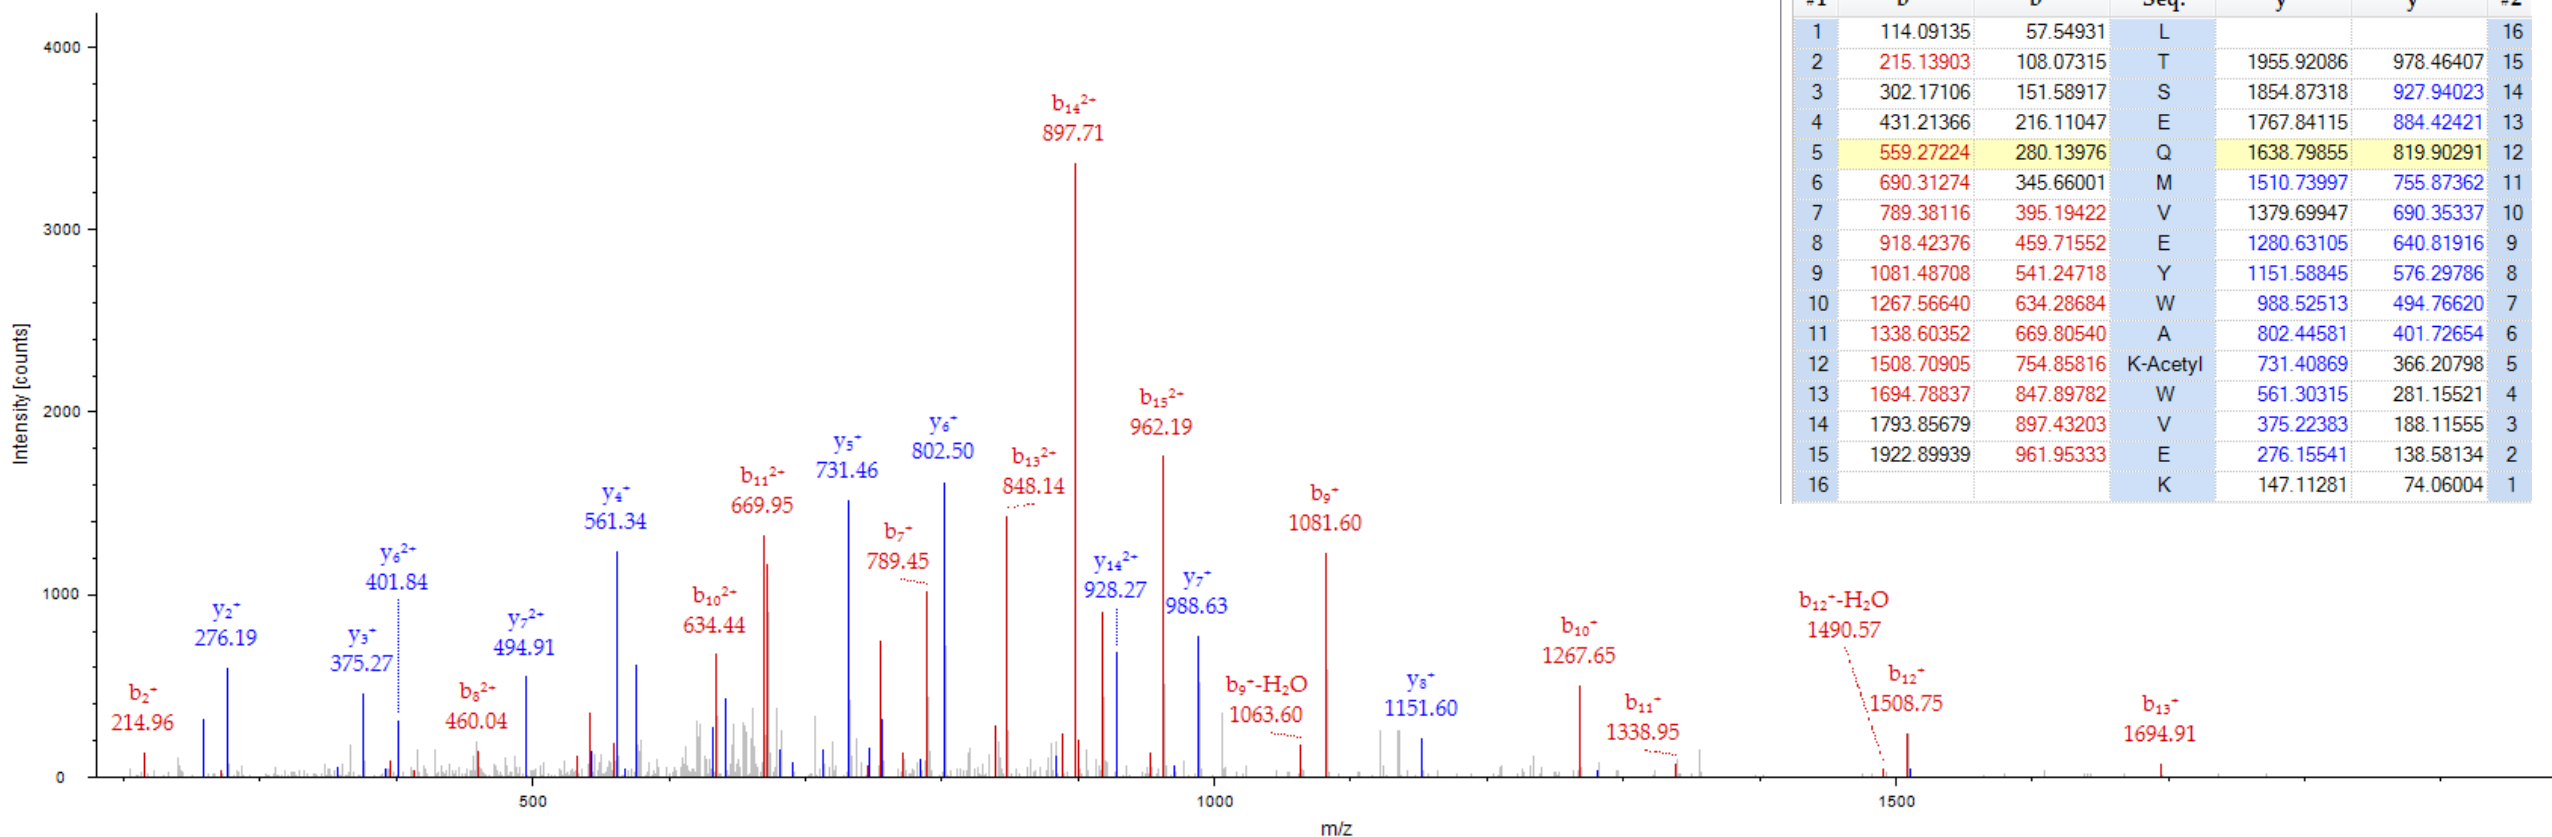

| Ion Series | Neutral Losses | Precursor Ions  |          |                |                 |    |
|------------|----------------|-----------------|----------|----------------|-----------------|----|
| #1         | b <sup>+</sup> | b <sup>2+</sup> | Seq.     | y <sup>+</sup> | y <sup>2+</sup> | #2 |
| 1          | 114.09135      | 57.54931        | L        |                |                 | 16 |
| 2          | 215.13903      | 108.07315       | T        | 1955.92086     | 978.46407       | 15 |
| 3          | 302.17106      | 151.58917       | S        | 1854.87318     | 927.94023       | 14 |
| 4          | 431.21366      | 216.11047       | E        | 1767.84115     | 884.42421       | 13 |
| 5          | 559.27224      | 280.13976       | Q        | 1638.79855     | 819.90291       | 12 |
| 6          | 690.31274      | 345.66001       | M        | 1510.73997     | 755.87362       | 11 |
| 7          | 789.38116      | 395.19422       | V        | 1379.69947     | 690.35337       | 10 |
| 8          | 918.42376      | 459.71552       | E        | 1280.63105     | 640.81916       | 9  |
| 9          | 1081.48708     | 541.24718       | Y        | 1151.58845     | 576.29786       | 8  |
| 10         | 1267.56640     | 634.28684       | W        | 988.52513      | 494.76620       | 7  |
| 11         | 1338.60352     | 669.80540       | A        | 802.44581      | 401.72654       | 6  |
| 12         | 1508.70905     | 754.85816       | K-Acetyl | 731.40869      | 366.20798       | 5  |
| 13         | 1694.78837     | 847.89782       | W        | 561.30315      | 281.15521       | 4  |
| 14         | 1793.85679     | 897.43203       | V        | 375.22383      | 188.11555       | 3  |
| 15         | 1922.89939     | 961.95333       | E        | 276.15541      | 138.58134       | 2  |
| 16         |                |                 | K        | 147.11281      | 74.06004        | 1  |

# Enolase - Eno

IGN<sub>k<sub>ac</sub></sub>IQLVGDDLFTNTSFLK

Extracted from: D:\DATA\_Orbitrap\_2016\GALLO\_BONTEMPS\GALLO\_20160208\Burdo\_Kac\_stat\_sansNP40\_01.raw #12647 RT: 59.41  
ITMS, CID@35.00, z=+3, Mono m/z=788.76630 Da, MH+=2364.28434 Da, Match Tol.=0.35 Da

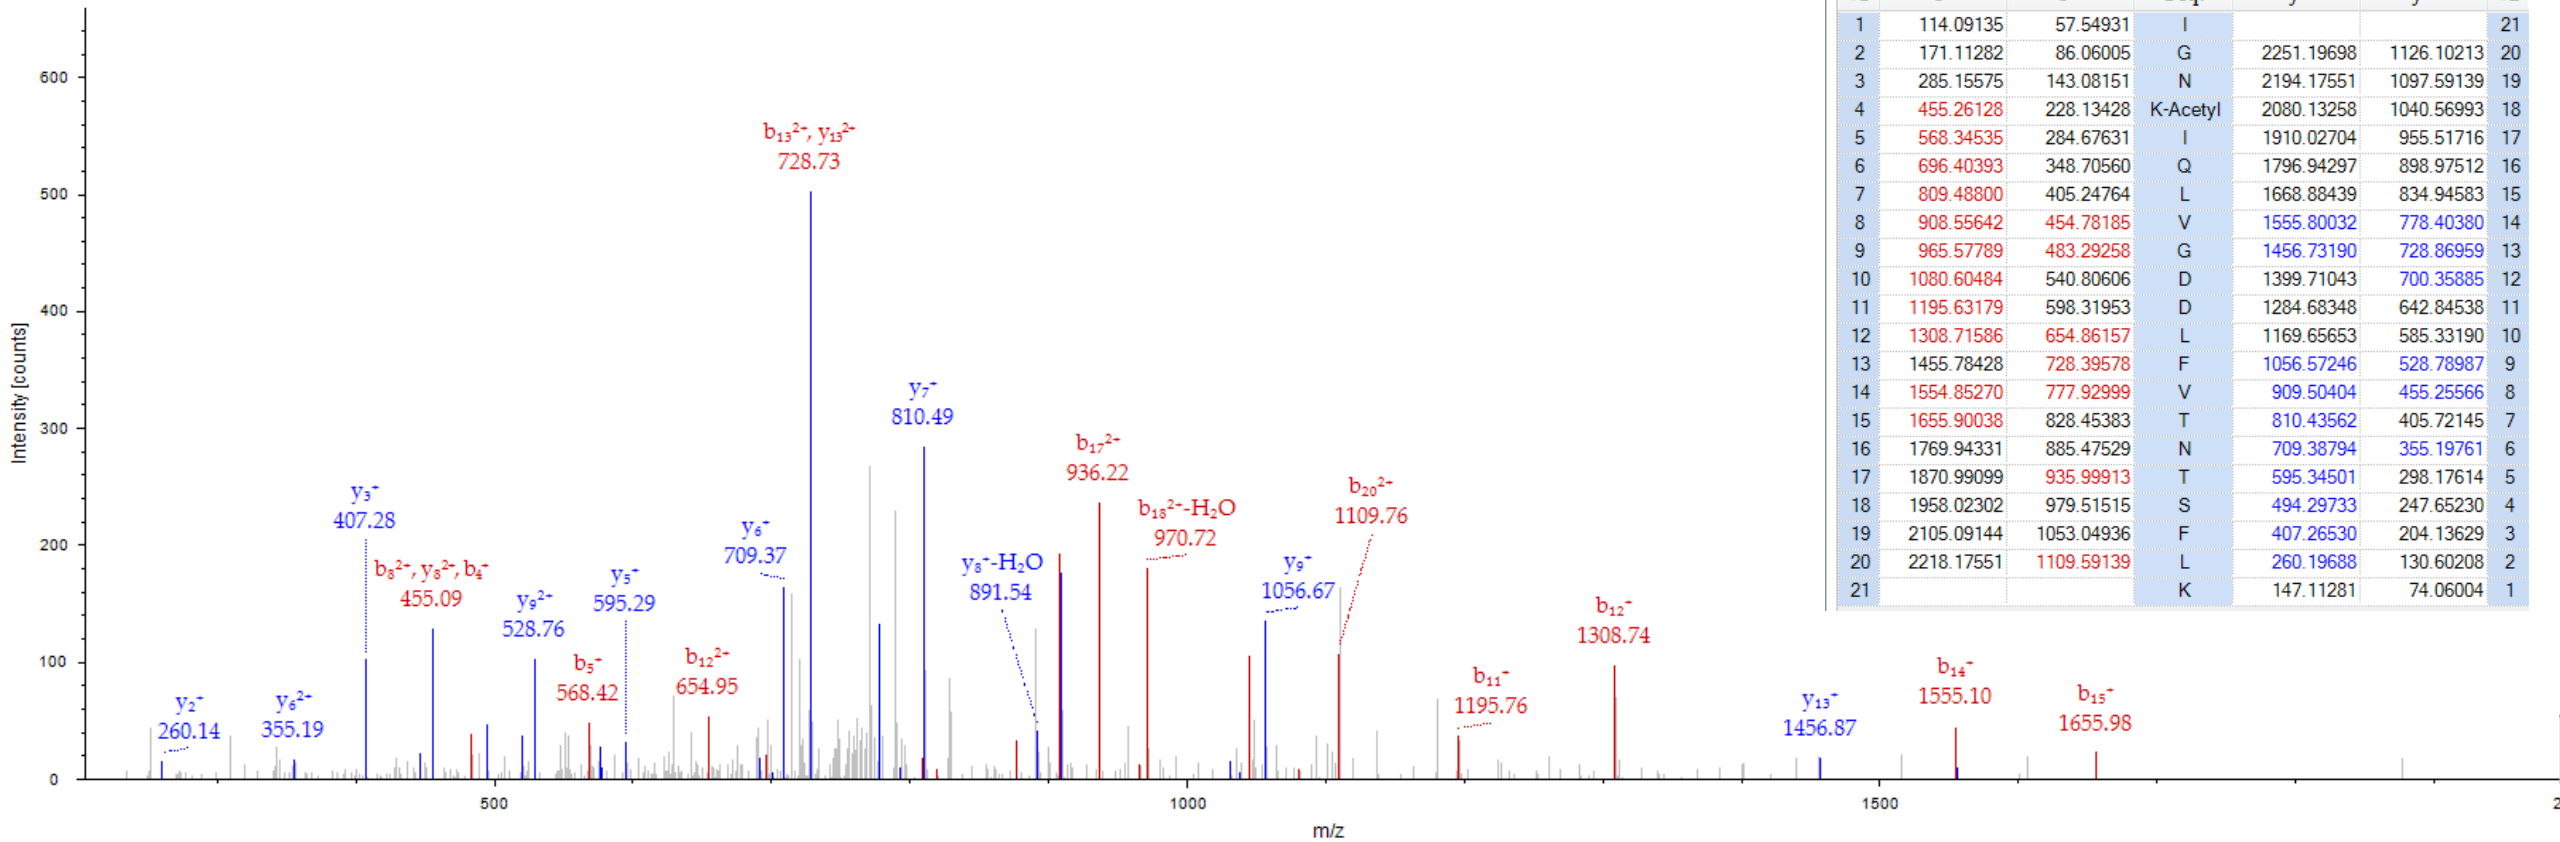

| Ion Series | Neutral Losses | Precursor Ions  |          |                |                 |    |
|------------|----------------|-----------------|----------|----------------|-----------------|----|
| #1         | b <sup>+</sup> | b <sup>2+</sup> | Seq.     | y <sup>+</sup> | y <sup>2+</sup> | #2 |
| 1          | 114.09135      | 57.54931        | I        |                |                 | 21 |
| 2          | 171.11282      | 86.06005        | G        | 2251.19698     | 1126.10213      | 20 |
| 3          | 285.15575      | 143.08151       | N        | 2194.17551     | 1097.59139      | 19 |
| 4          | 455.26128      | 228.13428       | K-Acetyl | 2080.13258     | 1040.56993      | 18 |
| 5          | 568.34535      | 284.67631       | I        | 1910.02704     | 955.51716       | 17 |
| 6          | 696.40393      | 348.70560       | Q        | 1796.94297     | 898.97512       | 16 |
| 7          | 809.48800      | 405.24764       | L        | 1668.88439     | 834.94583       | 15 |
| 8          | 908.55642      | 454.78185       | V        | 1555.80032     | 778.40380       | 14 |
| 9          | 965.57789      | 483.29258       | G        | 1456.73190     | 728.86959       | 13 |
| 10         | 1080.60484     | 540.80606       | D        | 1399.71043     | 700.35885       | 12 |
| 11         | 1195.63179     | 598.31953       | D        | 1284.68348     | 642.84538       | 11 |
| 12         | 1308.71586     | 654.86157       | L        | 1169.65653     | 585.33190       | 10 |
| 13         | 1455.78428     | 728.39578       | F        | 1056.57246     | 528.78987       | 9  |
| 14         | 1554.85270     | 777.92999       | V        | 909.50404      | 455.25566       | 8  |
| 15         | 1655.90038     | 828.45383       | T        | 810.43562      | 405.72145       | 7  |
| 16         | 1769.94331     | 885.47529       | N        | 709.38794      | 355.19761       | 6  |
| 17         | 1870.99099     | 935.99913       | T        | 595.34501      | 298.17614       | 5  |
| 18         | 1958.02302     | 979.51515       | S        | 494.29733      | 247.65230       | 4  |
| 19         | 2105.09144     | 1053.04936      | F        | 407.26530      | 204.13629       | 3  |
| 20         | 2218.17551     | 1109.59139      | L        | 260.19688      | 130.60208       | 2  |
| 21         |                |                 | K        | 147.11281      | 74.06004        | 1  |

# L-lactate dehydrogenase - LDH

AKGEVMDLNHGQMFL<sub>ac</sub>K

Extracted from: D:\DATA\_Orbitrap\_2016\GALLO\_BONTEMPS\GALLO\_20160219\Burdo\_Kac\_stat\_4\_01.raw #5742 RT: 35.76  
ITMS, CID@35.00, z=+3, Mono m/z=663.34381 Da, MH+=1988.01688 Da, Match Tol.=0.35 Da

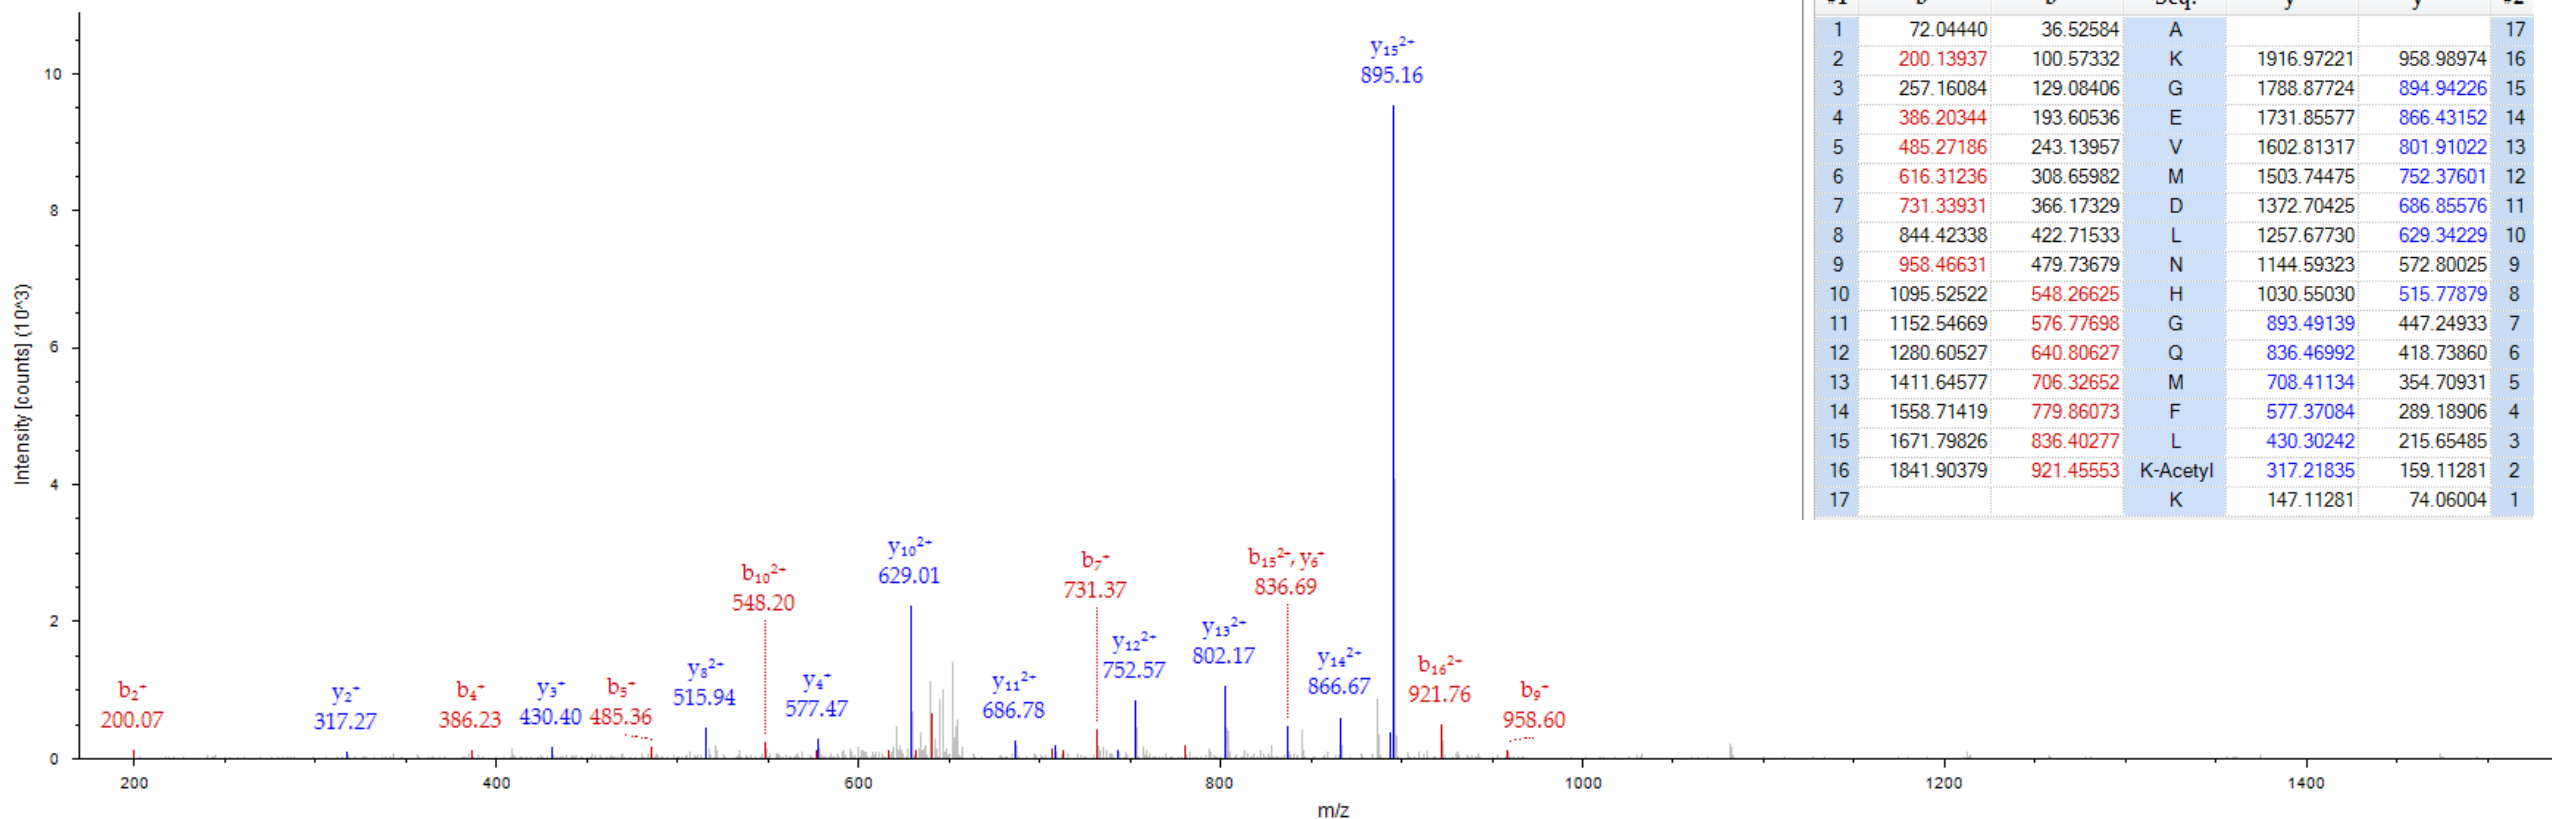

| Ion Series | Neutral Losses | Precursor Ions  |          |                |                 |    |
|------------|----------------|-----------------|----------|----------------|-----------------|----|
| #1         | b <sup>+</sup> | b <sup>2+</sup> | Seq.     | y <sup>-</sup> | y <sup>2+</sup> | #2 |
| 1          | 72.04440       | 36.52584        | A        |                |                 | 17 |
| 2          | 200.13937      | 100.57332       | K        | 1916.97221     | 958.98974       | 16 |
| 3          | 257.16084      | 129.08406       | G        | 1788.87724     | 894.94226       | 15 |
| 4          | 386.20344      | 193.60536       | E        | 1731.85577     | 866.43152       | 14 |
| 5          | 485.27186      | 243.13957       | V        | 1602.81317     | 801.91022       | 13 |
| 6          | 616.31236      | 308.65982       | M        | 1503.74475     | 752.37601       | 12 |
| 7          | 731.33931      | 366.17329       | D        | 1372.70425     | 686.85576       | 11 |
| 8          | 844.42338      | 422.71533       | L        | 1257.67730     | 629.34229       | 10 |
| 9          | 958.46631      | 479.73679       | N        | 1144.59323     | 572.80025       | 9  |
| 10         | 1095.52522     | 548.26625       | H        | 1030.55030     | 515.77879       | 8  |
| 11         | 1152.54669     | 576.77698       | G        | 893.49139      | 447.24933       | 7  |
| 12         | 1280.60527     | 640.80627       | Q        | 836.46992      | 418.73860       | 6  |
| 13         | 1411.64577     | 706.32652       | M        | 708.41134      | 354.70931       | 5  |
| 14         | 1558.71419     | 779.86073       | F        | 577.37084      | 289.18906       | 4  |
| 15         | 1671.79826     | 836.40277       | L        | 430.30242      | 215.65485       | 3  |
| 16         | 1841.90379     | 921.45553       | K-Acetyl | 317.21835      | 159.11281       | 2  |
| 17         |                |                 | K        | 147.11281      | 74.06004        | 1  |

# L-lactate dehydrogenase - LDH

LDLVDK<sub>ac</sub>NSK

Extracted from: D:\DATA\_Orbitrap\_2016\GALLO\_BONTEMPS\GALLO\_20160219\Burdo\_Kac\_stat\_4\_01.raw #4466 RT: 30.90  
ITMS, CID@35.00, z=+2, Mono m/z=537.29608 Da, MH+=1073.58489 Da, Match Tol.=0.35 Da

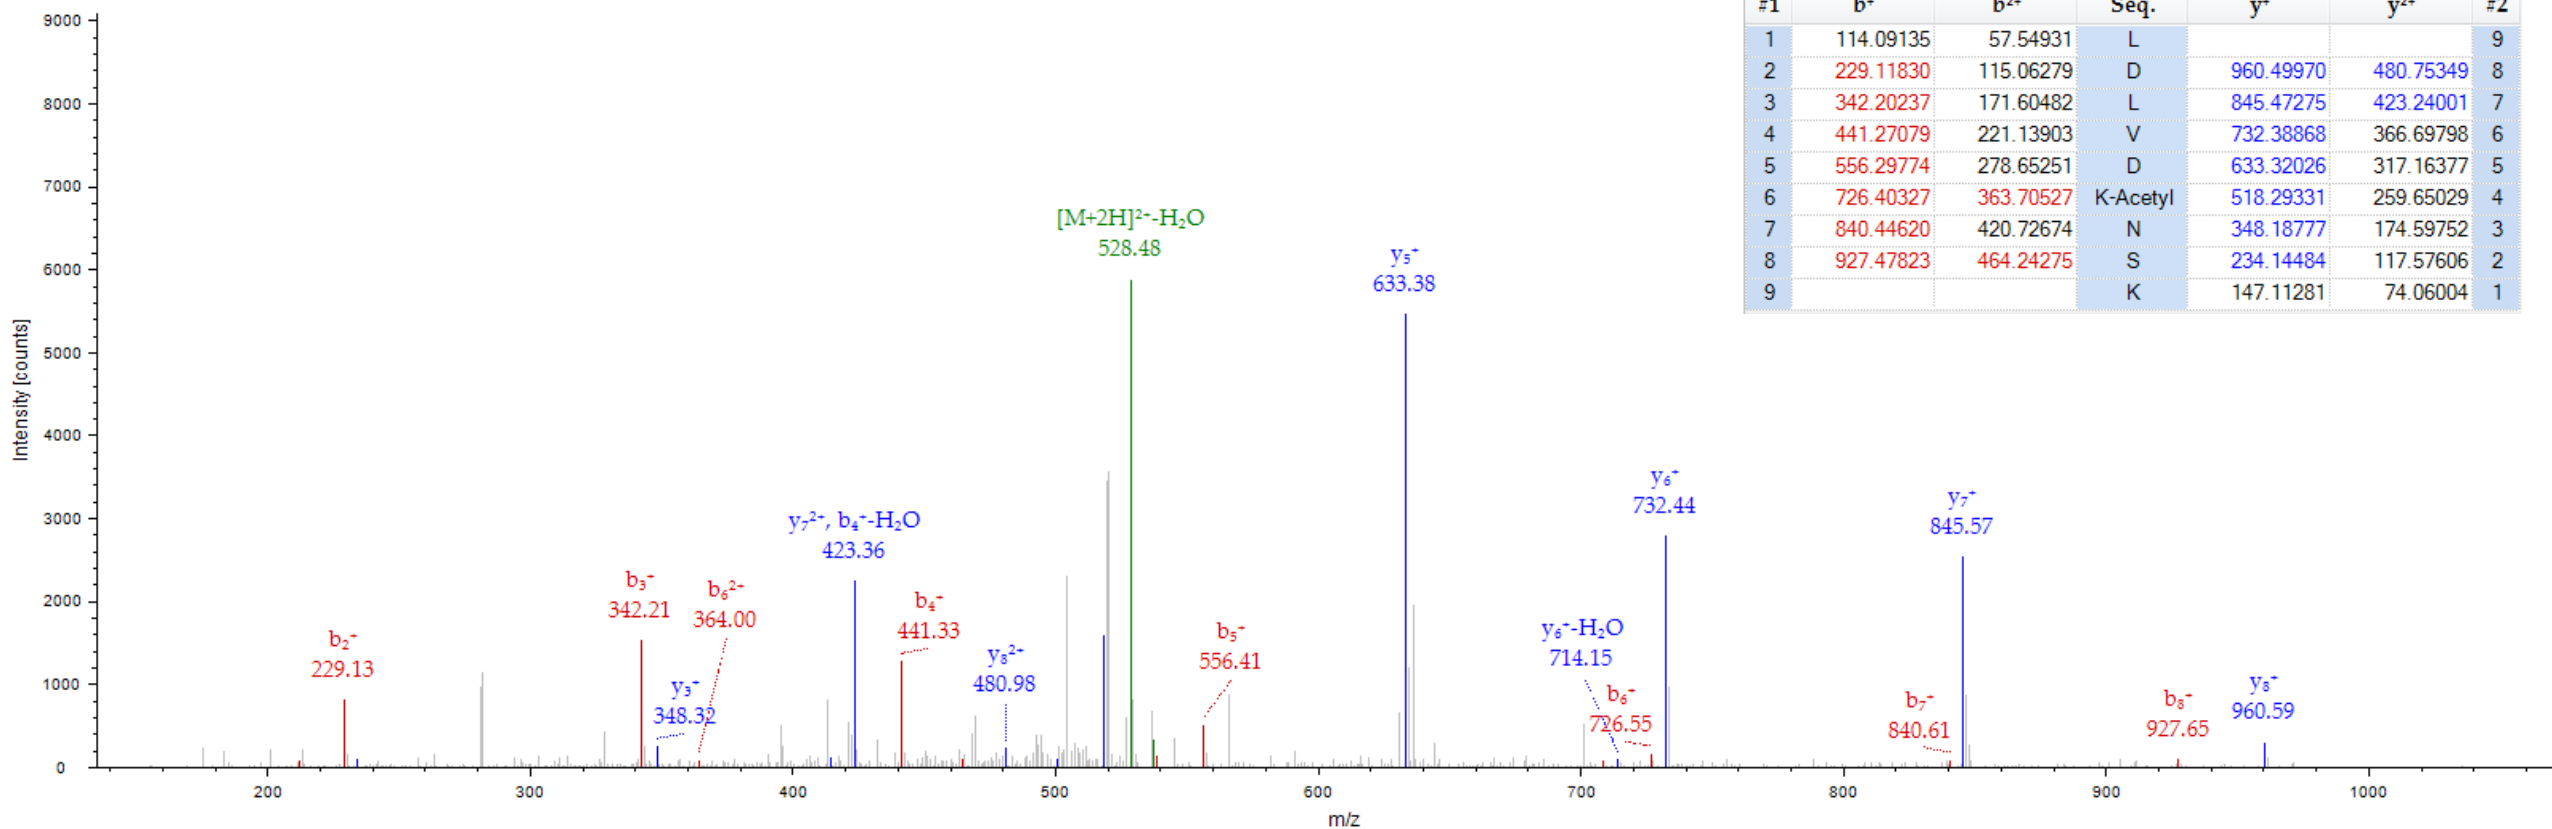

| Ion Series | Neutral Losses | Precursor Ions  |          |                |                 |    |
|------------|----------------|-----------------|----------|----------------|-----------------|----|
| #1         | b <sup>+</sup> | b <sup>2+</sup> | Seq.     | y <sup>+</sup> | y <sup>2+</sup> | #2 |
| 1          | 114.09135      | 57.54931        | L        |                |                 | 9  |
| 2          | 229.11830      | 115.06279       | D        | 960.49970      | 480.75349       | 8  |
| 3          | 342.20237      | 171.60482       | L        | 845.47275      | 423.24001       | 7  |
| 4          | 441.27079      | 221.13903       | V        | 732.38868      | 366.69798       | 6  |
| 5          | 556.29774      | 278.65251       | D        | 633.32026      | 317.16377       | 5  |
| 6          | 726.40327      | 363.70527       | K-Acetyl | 518.29331      | 259.65029       | 4  |
| 7          | 840.44620      | 420.72674       | N        | 348.18777      | 174.59752       | 3  |
| 8          | 927.47823      | 464.24275       | S        | 234.14484      | 117.57606       | 2  |
| 9          |                |                 | K        | 147.11281      | 74.06004        | 1  |

# L-lactate dehydrogenase - LDH

FNSSANQL<sub>k<sub>ac</sub></sub>SYIDK

Extracted from: D:\DATA\_Orbitrap\_2016\GALLO\_BONTEMPS\GALLO\_20160219\Burdo\_Kac\_stat\_4\_01.raw #7133 RT: 40.50  
ITMS, CID@35.00, z=+2, Mono m/z=828.91626 Da, MH+=1656.82524 Da, Match Tol.=0.35 Da

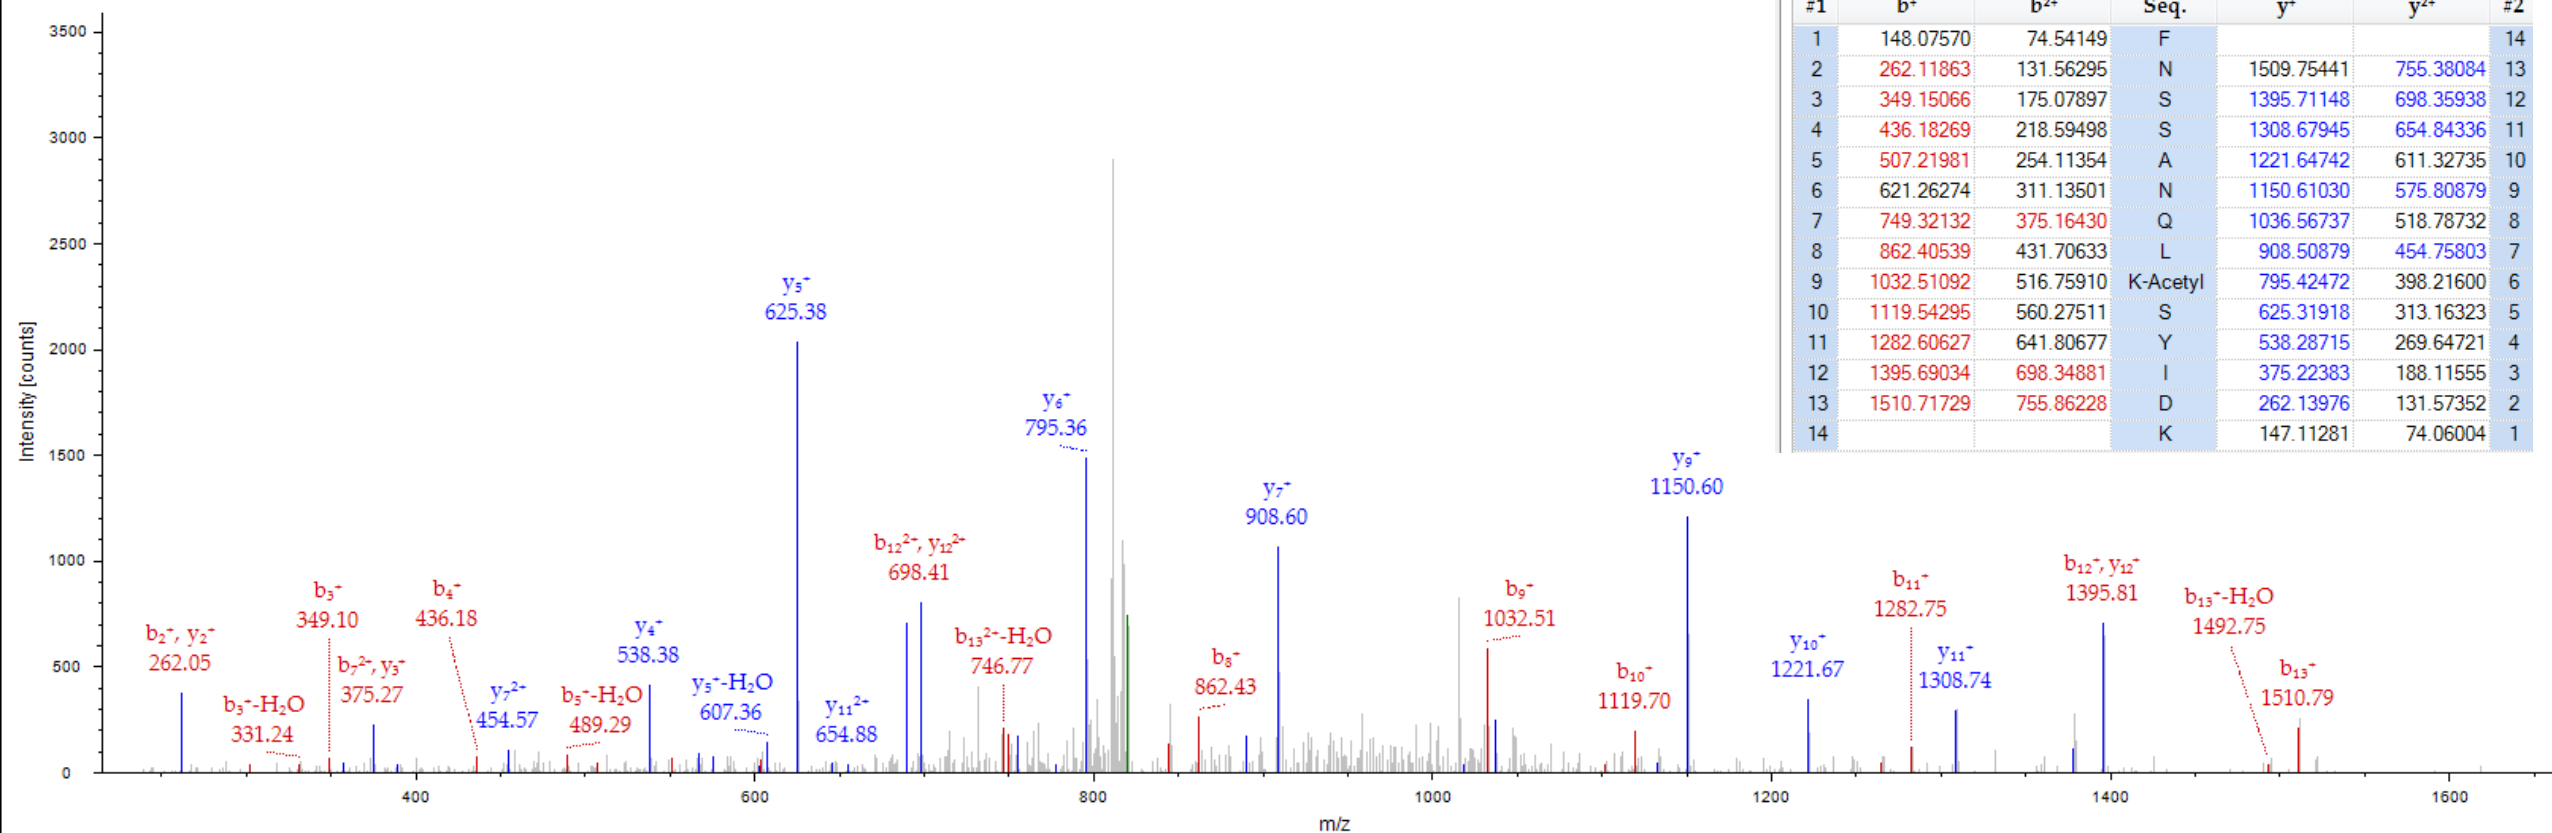

| #1 | b <sup>+</sup> | b <sup>2+</sup> | Seq.     | y <sup>+</sup> | y <sup>2+</sup> | #2 |
|----|----------------|-----------------|----------|----------------|-----------------|----|
| 1  | 148.07570      | 74.54149        | F        |                |                 | 14 |
| 2  | 262.11863      | 131.56295       | N        | 1509.75441     | 755.38084       | 13 |
| 3  | 349.15066      | 175.07897       | S        | 1395.71148     | 698.35938       | 12 |
| 4  | 436.18269      | 218.59498       | S        | 1308.67945     | 654.84336       | 11 |
| 5  | 507.21981      | 254.11354       | A        | 1221.64742     | 611.32735       | 10 |
| 6  | 621.26274      | 311.13501       | N        | 1150.61030     | 575.80879       | 9  |
| 7  | 749.32132      | 375.16430       | Q        | 1036.56737     | 518.78732       | 8  |
| 8  | 862.40539      | 431.70633       | L        | 908.50879      | 454.75803       | 7  |
| 9  | 1032.51092     | 516.75910       | K-Acetyl | 795.42472      | 398.21600       | 6  |
| 10 | 1119.54295     | 560.27511       | S        | 625.31918      | 313.16323       | 5  |
| 11 | 1282.60627     | 641.80677       | Y        | 538.28715      | 269.64721       | 4  |
| 12 | 1395.69034     | 698.34881       | I        | 375.22383      | 188.11555       | 3  |
| 13 | 1510.71729     | 755.86228       | D        | 262.13976      | 131.57352       | 2  |
| 14 |                |                 | K        | 147.11281      | 74.06004        | 1  |

# Triosephosphate isomerase - TpiA

LEIT<sub>ac</sub>LYSK

Extracted from: D:\DATA\_Orbitrap\_2016\GALLO\_BONTEMPS\GALLO\_20160219\Burdo\_Kac\_stat\_4\_01.raw #6627 RT: 38.83  
ITMS, CID@35.00, z=+2, Mono m/z=568.83148 Da, MH+=1136.65569 Da, Match Tol.=0.35 Da

| Ion Series | Neutral Losses | Precursor Ions  |          |                |                 |    |
|------------|----------------|-----------------|----------|----------------|-----------------|----|
| #1         | b <sup>+</sup> | b <sup>2+</sup> | Seq.     | y <sup>+</sup> | y <sup>2+</sup> | #2 |
| 1          | 114.09135      | 57.54931        | L        |                |                 | 9  |
| 2          | 243.13395      | 122.07061       | E        | 1023.57212     | 512.28970       | 8  |
| 3          | 356.21802      | 178.61265       | I        | 894.52952      | 447.76840       | 7  |
| 4          | 457.26570      | 229.13649       | T        | 781.44545      | 391.22636       | 6  |
| 5          | 627.37123      | 314.18925       | K-Acetyl | 680.39777      | 340.70252       | 5  |
| 6          | 740.45530      | 370.73129       | L        | 510.29223      | 255.64975       | 4  |
| 7          | 903.51862      | 452.26295       | Y        | 397.20816      | 199.10772       | 3  |
| 8          | 990.55065      | 495.77896       | S        | 234.14484      | 117.57606       | 2  |
| 9          |                |                 | K        | 147.11281      | 74.06004        | 1  |

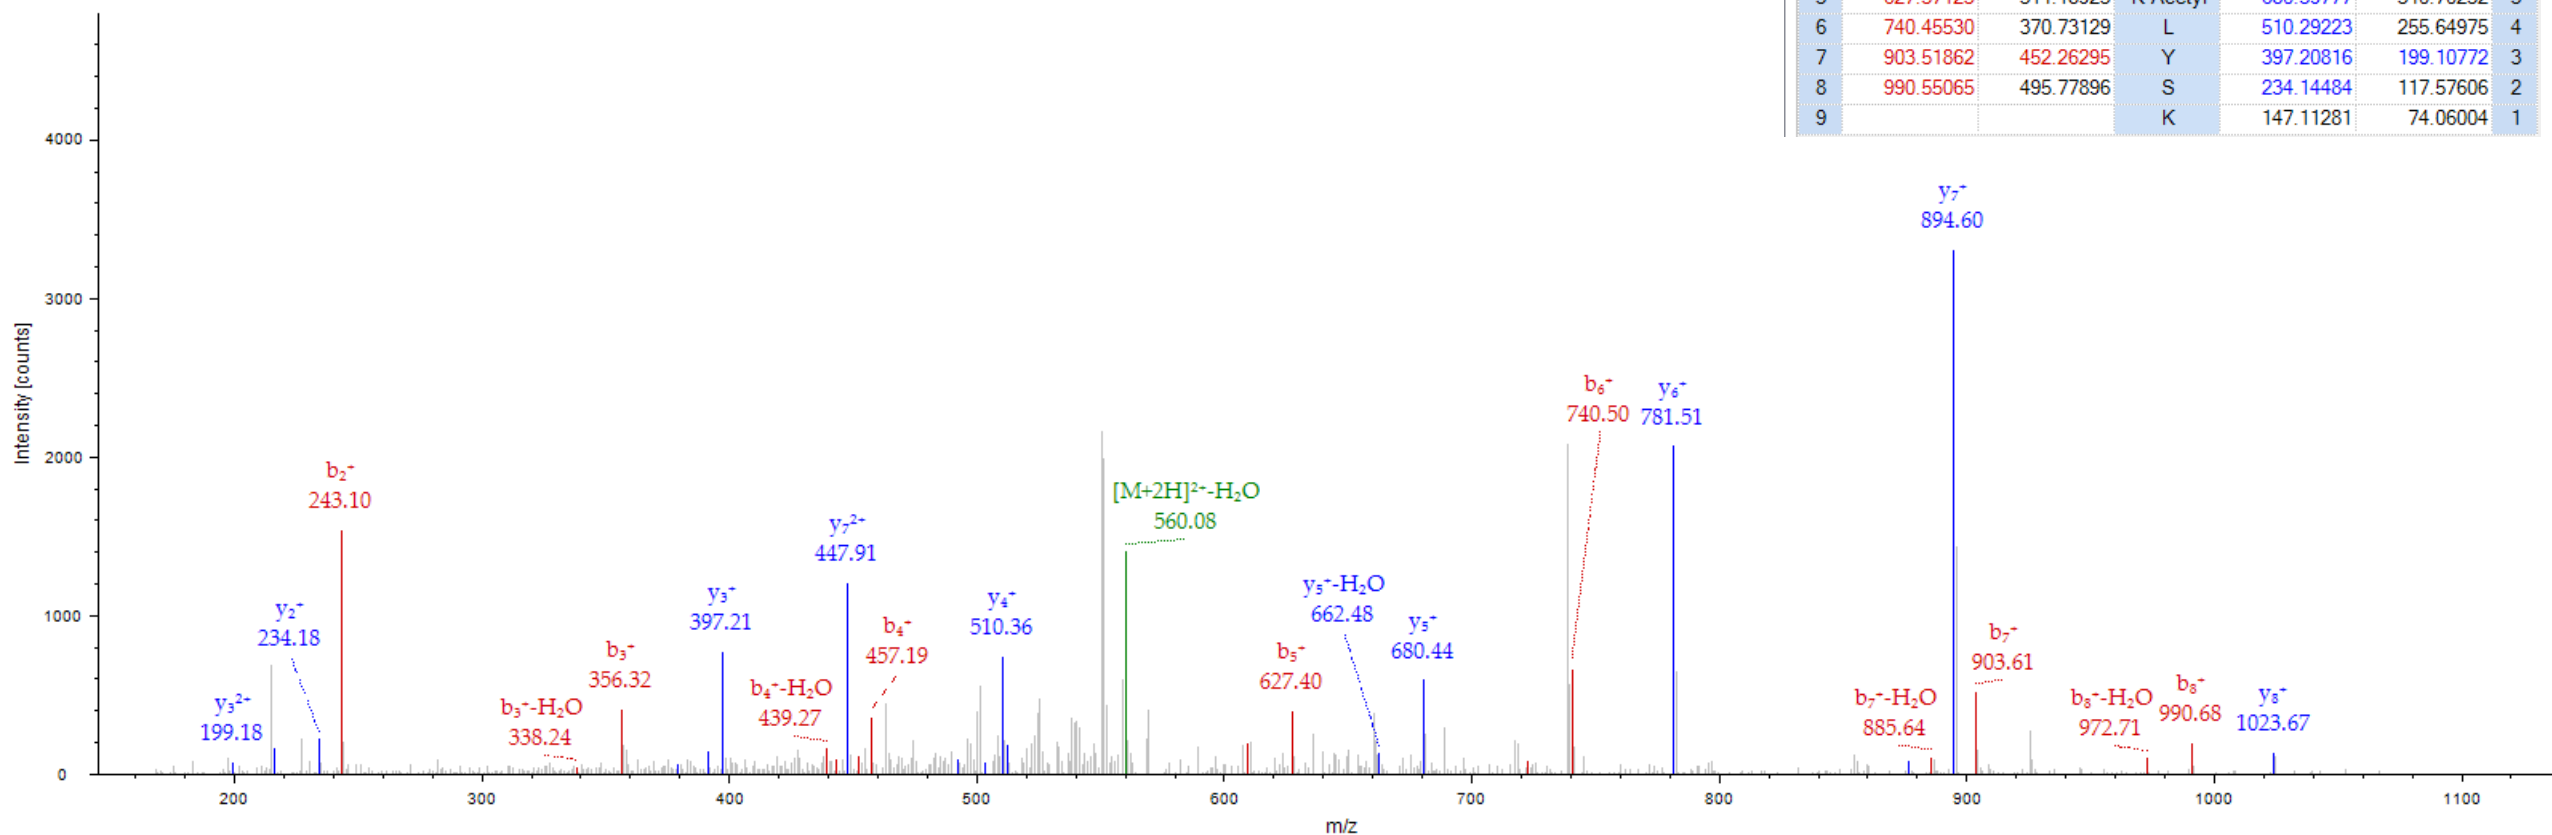

# Triosephosphate isomerase - TpiA

LYSK<sub>ac</sub>SASDNIIIQYGGSVNSNVK

Extracted from: D:\DATA\_Orbitrap\_2016\GALLO\_BONTEMPS\GALLO\_20160208\Burdo\_Kac\_stat\_\_sansNP40\_01.raw #8274 RT: 42.88  
 ITMS, CID@35.00, z=+2, Mono m/z=1307.16406 Da, MH+=2613.32085 Da, Match Tol.=0.35 Da

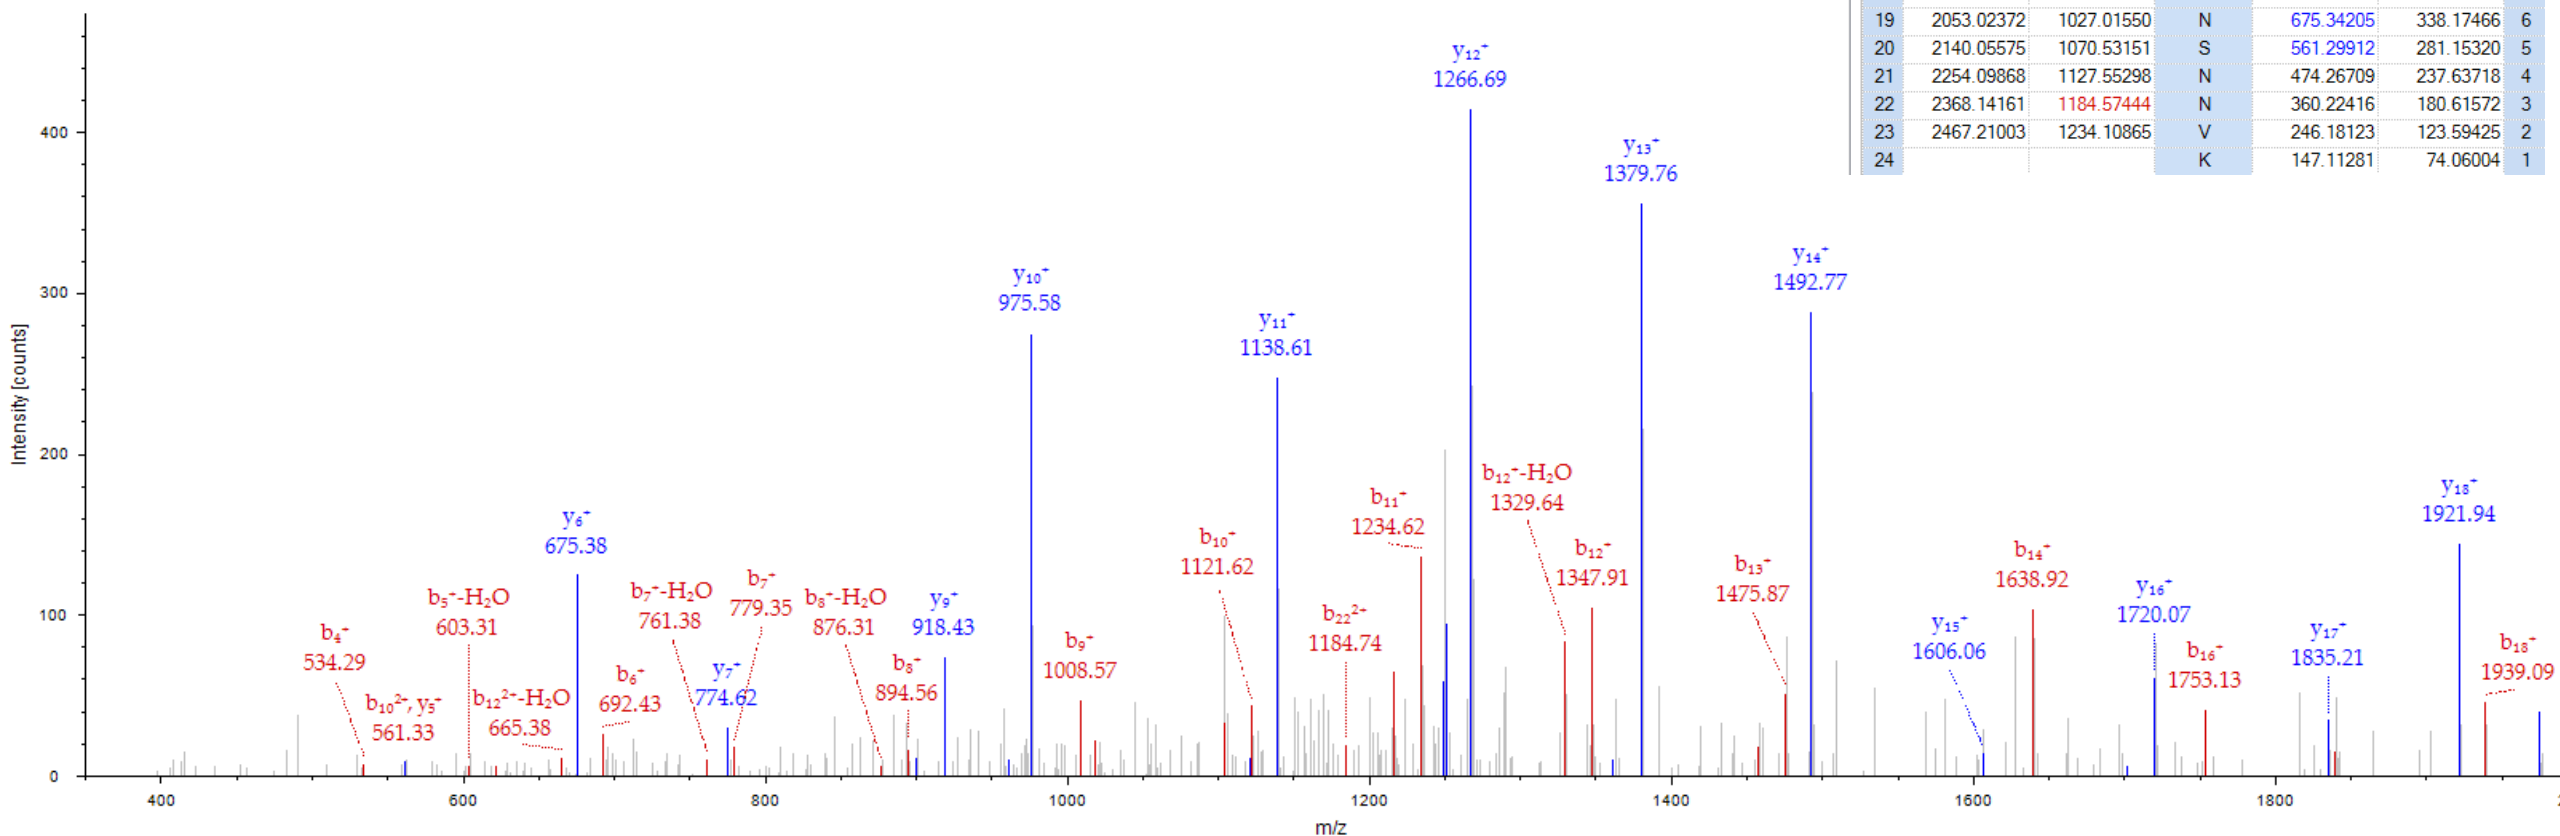

| Ion Series | Neutral Losses | Precursor Ions  |          |                |                 |    |
|------------|----------------|-----------------|----------|----------------|-----------------|----|
| #1         | b <sup>+</sup> | b <sup>2+</sup> | Seq.     | y <sup>+</sup> | y <sup>2+</sup> | #2 |
| 1          | 114.09135      | 57.54931        | L        |                |                 | 24 |
| 2          | 277.15467      | 139.08097       | Y        | 2500.23150     | 1250.61939      | 23 |
| 3          | 364.18670      | 182.59699       | S        | 2337.16818     | 1169.08773      | 22 |
| 4          | 534.29223      | 267.64975       | K-Acetyl | 2250.13615     | 1125.57171      | 21 |
| 5          | 621.32426      | 311.16577       | S        | 2080.03061     | 1040.51894      | 20 |
| 6          | 692.36138      | 346.68433       | A        | 1992.99858     | 997.00293       | 19 |
| 7          | 779.39341      | 390.20034       | S        | 1921.96146     | 961.48437       | 18 |
| 8          | 894.42036      | 447.71382       | D        | 1834.92943     | 917.96835       | 17 |
| 9          | 1008.46329     | 504.73528       | N        | 1719.90248     | 860.45488       | 16 |
| 10         | 1121.54736     | 561.27732       | I        | 1605.85955     | 803.43341       | 15 |
| 11         | 1234.63143     | 617.81935       | I        | 1492.77548     | 746.89138       | 14 |
| 12         | 1347.71550     | 674.36139       | I        | 1379.69141     | 690.34934       | 13 |
| 13         | 1475.77408     | 738.39068       | Q        | 1266.60734     | 633.80731       | 12 |
| 14         | 1638.83740     | 819.92234       | Y        | 1138.54876     | 569.77802       | 11 |
| 15         | 1695.85887     | 848.43307       | G        | 975.48544      | 488.24636       | 10 |
| 16         | 1752.88034     | 876.94381       | G        | 918.46397      | 459.73562       | 9  |
| 17         | 1839.91237     | 920.45982       | S        | 861.44250      | 431.22489       | 8  |
| 18         | 1938.98079     | 969.99403       | V        | 774.41047      | 387.70887       | 7  |
| 19         | 2053.02372     | 1027.01550      | N        | 675.34205      | 338.17466       | 6  |
| 20         | 2140.05575     | 1070.53151      | S        | 561.29912      | 281.15320       | 5  |
| 21         | 2254.09868     | 1127.55298      | N        | 474.26709      | 237.63718       | 4  |
| 22         | 2368.14161     | 1184.57444      | N        | 360.22416      | 180.61572       | 3  |
| 23         | 2467.21003     | 1234.10865      | V        | 246.18123      | 123.59425       | 2  |
| 24         |                |                 | K        | 147.11281      | 74.06004        | 1  |
